# Supplementary material for: Lipid metabolism disorders and albuminuria risk: insights from National Health and Nutrition Examination Survey 2001–2018 and Mendelian randomization analyses
Source: Ren Fail. 2024 Nov 3;46(2):2420841. doi: 10.1080/0886022X.2024.2420841 (PMC11536668; doi:10.1080/0886022X.2024.2420841)
Supplement: Table S1.xls [file IRNF_A_2420841_SM2541.xls]

## Sheet: Sheet1
Exposure	SNP	EA	OA	Beta	EAF	SE	P-value	R2	F-statistic	mr_keep	Study	Sample size	Ancestry
Cholesterol esters in large HDL	rs1037791	A	G	0.054131	0.660997	0.010936	1.01e-06	0.000656591	12.6615	TRUE	Kettunen J	19273	European
	rs10861970	A	C	-0.055154	0.34464	0.011796	3.86e-06	0.000687068	13.2496	TRUE
	rs10905500	A	T	0.051796	0.660265	0.010977	3.15e-06	0.000601798	11.6042	FALSE
	rs11632618	A	G	0.218584	0.061802	0.023568	5.13e-20	0.00277034	53.5356	TRUE
	rs12271743	C	T	0.107016	0.057627	0.022032	1.6e-06	0.000621937	11.9928	TRUE
	rs148159681	C	T	-0.448322	0.004672	0.093961	2.44e-06	0.00093465	18.0285	TRUE
	rs1689797	A	C	-0.05695	0.290722	0.011327	6.83e-07	0.000668778	12.8966	TRUE
	rs174529	C	T	-0.082001	0.409265	0.010539	1.53e-14	0.00162568	31.3795	TRUE
	rs1883025	T	C	-0.071698	0.193849	0.01305	5.74e-08	0.00080333	15.4934	TRUE
	rs2240198	T	C	-0.075849	0.157099	0.015715	1.87e-06	0.000761815	14.6921	TRUE
	rs247617	A	C	0.208627	0.288773	0.011386	2.9e-73	0.00893935	173.824	TRUE
	rs261291	C	T	0.181235	0.376501	0.010618	8.02e-64	0.00771056	149.745	TRUE
	rs3133431	A	G	0.052158	0.609401	0.010583	1.12e-06	0.000647554	12.4871	TRUE
	rs3741521	A	G	-0.05239	0.59774	0.010713	1.36e-06	0.000659957	12.7264	TRUE
	rs40270	C	A	-0.055887	0.715247	0.011408	1.3e-06	0.00063613	12.2667	TRUE
	rs4149303	G	A	0.088624	0.108055	0.01812	1.36e-06	0.000756982	14.5989	TRUE
	rs429358	C	T	-0.090219	0.168024	0.013862	1.29e-10	0.00113783	21.9521	TRUE
	rs59347135	G	C	-0.184264	0.038681	0.029776	9.82e-10	0.00126254	24.3612	TRUE
	rs6065904	A	G	-0.1334	0.233223	0.012222	4.17e-27	0.00318238	61.5234	TRUE
	rs632557	G	A	0.096064	0.913708	0.0188	4.48e-07	0.000727611	14.032	TRUE
	rs6494025	T	C	0.262459	0.03658	0.029038	4.34e-19	0.00242763	46.8967	TRUE
	rs6507939	C	A	0.097365	0.839141	0.013967	5.76e-12	0.00127964	24.6914	TRUE
	rs6544366	T	G	0.066565	0.274622	0.01146	9.62e-09	0.000882656	17.0247	TRUE
	rs67053123	A	T	0.091286	0.147378	0.014852	1.27e-09	0.00104712	20.2003	TRUE
	rs682915	C	T	-0.051263	0.364898	0.010652	1.99e-06	0.000609008	11.7433	TRUE
	rs686030	A	C	0.074717	0.872197	0.01535	1.52e-06	0.000622292	11.9997	TRUE
	rs6905288	A	G	-0.05056	0.578788	0.010937	4.96e-06	0.00062321	12.0174	TRUE
	rs7256730	T	C	-0.05684	0.758424	0.012254	4.61e-06	0.000591935	11.4139	TRUE
	rs75551077	C	G	0.150089	0.086418	0.018389	7.52e-16	0.00177848	34.3342	TRUE
	rs9380455	A	C	0.051928	0.644629	0.011168	4.37e-06	0.000617725	11.9115	TRUE
	rs964184	C	G	0.085972	0.857677	0.014598	5.99e-09	0.000902221	17.4024	TRUE
Cholesterol esters in large VLDL	rs10102352	G	A	0.051339	0.627818	0.010591	1.88e-06	0.000615863	11.8756	TRUE	Kettunen J	19273	European
	rs10449300	G	A	-0.064949	0.3354	0.011123	9.4e-09	0.000940304	18.1377	TRUE
	rs112635299	T	G	0.213217	0.017866	0.041617	4.72e-07	0.000797704	15.3848	TRUE
	rs11591147	T	G	-0.51831	0.030715	0.034723	8.6e-49	0.007998	155.372	TRUE
	rs137992968	T	C	-0.218228	0.022573	0.034952	8.32e-10	0.00105074	20.2701	TRUE
	rs142130958	A	G	-0.236648	0.101869	0.017214	1.19e-41	0.00512374	99.2482	TRUE
	rs144064722	G	A	0.230859	0.025283	0.034023	2.53e-11	0.00131341	25.344	TRUE
	rs149623	C	T	0.050134	0.449513	0.010293	1.68e-06	0.000621948	11.993	TRUE
	rs185415345	A	G	-0.173195	0.046556	0.027268	4.24e-10	0.0013315	25.6936	TRUE
	rs193084249	G	A	0.182861	0.032129	0.031243	8.68e-09	0.00103982	20.0592	TRUE
	rs1993679	A	G	0.083192	0.109584	0.016487	7e-07	0.00067531	13.0227	TRUE
	rs2207132	A	G	0.143134	0.059698	0.02452	9.5e-09	0.00115004	22.1879	TRUE
	rs2341585	G	C	0.064477	0.171081	0.013736	3.92e-06	0.000589554	11.368	TRUE
	rs2815345	A	T	0.051863	0.64188	0.010715	1.94e-06	0.000618298	11.9226	TRUE
	rs2965152	A	G	-0.060746	0.399178	0.010622	1.88e-08	0.000885009	17.0701	TRUE
	rs2980860	G	A	-0.0651	0.48076	0.010286	4.88e-10	0.00105793	20.409	FALSE
	rs34042070	G	C	0.074023	0.19909	0.012866	1.54e-08	0.000873708	16.852	TRUE
	rs3741298	T	C	-0.07376	0.771465	0.012201	2.78e-09	0.000959204	18.5026	TRUE
	rs4608457	T	C	-0.131226	0.04467	0.02714	1.99e-06	0.000734868	14.172	TRUE
	rs553741	C	G	0.077665	0.624432	0.010909	2.56e-12	0.00141457	27.2988	TRUE
	rs62120792	C	T	-0.092112	0.139114	0.01492	1.28e-09	0.00101613	19.6017	TRUE
	rs62523994	A	G	0.05529	0.390666	0.010599	2.91e-07	0.000727703	14.0338	TRUE
	rs629301	T	G	0.134858	0.783555	0.012397	1.05e-26	0.0030844	59.6233	TRUE
	rs635634	T	C	0.074238	0.20054	0.012819	1.24e-08	0.000883589	17.0427	TRUE
	rs6448772	T	C	-0.071718	0.841042	0.014868	2.1e-06	0.000687633	13.2605	TRUE
	rs6756629	A	G	-0.13357	0.081568	0.018792	2.78e-12	0.00133655	25.7911	TRUE
	rs7095805	A	C	-0.048992	0.452304	0.010342	3.2e-06	0.000594594	11.4652	TRUE
	rs73066442	G	A	0.069161	0.249027	0.011942	1.24e-08	0.000894527	17.2539	TRUE
	rs73107473	A	G	0.069512	0.186929	0.013771	6.93e-07	0.000734387	14.1628	TRUE
	rs7412	T	C	-0.571074	0.055504	0.025746	1.54e-105	0.0170966	335.199	TRUE
	rs7771340	G	C	-0.106411	0.057665	0.022209	2.46e-06	0.000615305	11.8648	TRUE
	rs79225634	T	C	0.093823	0.353218	0.010801	1.33e-17	0.00201103	38.8327	TRUE
	rs8106814	C	T	-0.09969	0.220661	0.014391	9.68e-12	0.00170905	32.9915	TRUE
	rs835616	G	A	0.052377	0.628015	0.010957	2.59e-06	0.00064088	12.3583	TRUE
	rs934197	A	G	0.114845	0.284745	0.01146	6.6e-23	0.00268622	51.9055	TRUE
Cholesterol esters in mediumHDL	rs10804330	C	T	0.049264	0.43258	0.010368	2.55e-06	0.000595704	11.4867	TRUE	Kettunen J	19273	European
	rs11114074	A	G	-0.05591	0.300681	0.011333	1.04e-06	0.000657295	12.6751	TRUE
	rs117602166	C	T	0.163649	0.026606	0.034892	3.43e-06	0.000693577	13.3752	TRUE
	rs117654218	C	G	0.127261	0.058137	0.023129	5.13e-08	0.000886811	17.1049	TRUE
	rs12299167	C	T	0.315772	0.007046	0.068468	4.98e-06	0.00069762	13.4532	TRUE
	rs1367117	A	G	-0.066226	0.284518	0.011469	1.09e-08	0.000892823	17.221	TRUE
	rs17347152	C	T	0.071277	0.143563	0.015426	4.78e-06	0.00062465	12.0452	TRUE
	rs2126259	C	T	0.088876	0.861881	0.014847	3.11e-09	0.000940307	18.1377	TRUE
	rs247617	A	C	0.160557	0.288773	0.011396	3.15e-44	0.00529448	102.573	TRUE
	rs429358	C	T	-0.080698	0.168024	0.013834	7.73e-09	0.000910348	17.5593	TRUE
	rs6073966	T	C	0.086871	0.143985	0.014607	3.93e-09	0.00093014	17.9414	TRUE
	rs609526	A	T	-0.0517	0.440509	0.010418	8.97e-07	0.000658763	12.7034	FALSE
	rs6507939	C	A	0.067648	0.839141	0.01394	1.55e-06	0.000617718	11.9114	TRUE
	rs7112577	G	C	0.10136	0.057733	0.021926	4.73e-06	0.000558896	10.7765	TRUE
	rs75835816	C	G	-0.233431	0.0194	0.038111	1.33e-09	0.0010366	19.997	TRUE
	rs79363762	C	T	0.079743	0.120253	0.017121	4.01e-06	0.000672727	12.9728	TRUE
	rs80263864	T	C	-0.176071	0.018851	0.038129	4.84e-06	0.000573383	11.056	TRUE
	rs9380455	A	C	0.052993	0.644629	0.011143	2.5e-06	0.000643323	12.4055	TRUE
	rs964184	C	G	0.084235	0.857677	0.01456	1.02e-08	0.000866132	16.7057	TRUE
Cholesterol esters in medium LDL	rs10244139	G	A	-0.107786	0.054112	0.023128	4.6e-06	0.000594645	11.4662	TRUE	Kettunen J	19273	European
	rs10449300	G	A	-0.062632	0.3354	0.011126	3.12e-08	0.000874412	16.8655	TRUE
	rs112635299	T	G	0.245966	0.017866	0.041611	6.19e-09	0.00106157	20.4792	TRUE
	rs11591147	T	G	-0.506389	0.030715	0.034749	1.39e-46	0.00763432	148.253	TRUE
	rs116319294	T	C	0.177344	0.021956	0.037073	2.56e-06	0.000675374	13.0239	TRUE
	rs137992968	T	C	-0.211675	0.022573	0.03496	2.63e-09	0.000988582	19.0698	TRUE
	rs142130958	A	G	-0.230926	0.101869	0.017222	1.06e-39	0.00487896	94.4834	TRUE
	rs144064722	G	A	0.249694	0.025283	0.034015	5.31e-13	0.00153647	29.6548	TRUE
	rs185415345	A	G	-0.166772	0.046556	0.027274	1.84e-09	0.00123457	23.8209	TRUE
	rs193084249	G	A	0.180624	0.032129	0.031248	1.32e-08	0.00101453	19.5709	TRUE
	rs1993679	A	G	0.078406	0.109584	0.016483	2.91e-06	0.000599845	11.5665	TRUE
	rs2207132	A	G	0.14166	0.059698	0.024524	1.35e-08	0.00112648	21.7328	TRUE
	rs2815345	A	T	0.052908	0.64188	0.010717	1.21e-06	0.000643465	12.4082	TRUE
	rs2965152	A	G	-0.059391	0.399178	0.010624	3.88e-08	0.000845968	16.3164	TRUE
	rs2980860	G	A	-0.067888	0.48076	0.010286	8.66e-11	0.00115049	22.1966	FALSE
	rs34042070	G	C	0.072196	0.19909	0.012869	3.47e-08	0.000831112	16.0297	TRUE
	rs3741298	T	C	-0.083083	0.771465	0.0122	2.15e-11	0.00121701	23.4815	TRUE
	rs4608457	T	C	-0.132638	0.04467	0.027143	1.55e-06	0.000750767	14.4789	TRUE
	rs553741	C	G	0.072529	0.624432	0.010913	6.39e-11	0.00123366	23.8033	TRUE
	rs62120792	C	T	-0.086121	0.139114	0.014925	1.4e-08	0.000888249	17.1327	TRUE
	rs62523994	A	G	0.053731	0.390666	0.010601	6.25e-07	0.000687244	13.253	TRUE
	rs629301	T	G	0.133591	0.783555	0.012399	3.17e-26	0.00302671	58.5049	TRUE
	rs635634	T	C	0.069593	0.20054	0.012822	9.49e-08	0.000776477	14.9751	TRUE
	rs6448772	T	C	-0.072102	0.841042	0.014869	1.86e-06	0.000695016	13.403	TRUE
	rs6756629	A	G	-0.1345	0.081568	0.018786	1.94e-12	0.00135523	26.152	TRUE
	rs7069594	G	C	-0.050892	0.377491	0.010697	2.9e-06	0.000608627	11.736	TRUE
	rs73066442	G	A	0.06736	0.249027	0.011945	2.95e-08	0.000848545	16.3662	TRUE
	rs73107473	A	G	0.074104	0.186929	0.013772	1.22e-07	0.000834619	16.0974	TRUE
	rs7412	T	C	-0.546228	0.055504	0.025786	2.04e-96	0.0156413	306.213	TRUE
	rs79225634	T	C	0.092145	0.353218	0.010803	5.03e-17	0.00193974	37.4534	TRUE
	rs8106814	C	T	-0.098507	0.220661	0.014394	1.72e-11	0.00166873	32.2119	TRUE
	rs835616	G	A	0.052465	0.628015	0.010955	2.49e-06	0.000643035	12.3999	TRUE
	rs934197	A	G	0.112747	0.284745	0.011463	4e-22	0.00258897	50.0215	TRUE
	rs9564536	A	C	0.051558	0.329345	0.010976	3.86e-06	0.000587141	11.3214	TRUE
Cholesterol esters in medium VLDL	rs10402112	A	T	-0.136481	0.095646	0.017961	6.68e-14	0.0016112	31.0996	TRUE	Kettunen J	19273	European
	rs115435623	G	C	0.147545	0.027606	0.031358	3.47e-06	0.000584379	11.2682	TRUE
	rs115849089	A	G	-0.162836	0.101403	0.017156	7.89e-21	0.00241611	46.6736	TRUE
	rs1168041	C	T	0.087015	0.727042	0.011727	2.52e-13	0.0015026	29.0002	TRUE
	rs12365864	G	A	0.068386	0.162413	0.014144	1.86e-06	0.000636187	12.2678	TRUE
	rs1260326	C	T	-0.088457	0.636562	0.010622	2.16e-16	0.00181024	34.9483	FALSE
	rs12641940	G	A	-0.156777	0.029048	0.031803	1.16e-06	0.000693232	13.3685	TRUE
	rs12916966	T	A	0.089398	0.098424	0.01807	1.06e-06	0.000709184	13.6764	TRUE
	rs140075367	C	T	-0.096977	0.080212	0.020084	1.91e-06	0.000693848	13.3804	TRUE
	rs146702609	T	C	-0.195308	0.023175	0.04104	2.68e-06	0.000863528	16.6554	TRUE
	rs147155020	C	T	0.271439	0.008802	0.057918	3.79e-06	0.000642815	12.3957	TRUE
	rs149041828	T	C	0.223746	0.020291	0.04539	1.16e-06	0.000995202	19.1976	TRUE
	rs187607506	T	C	-0.07067	0.211212	0.013207	1.31e-07	0.000832049	16.0478	TRUE
	rs193084249	G	A	0.148419	0.032129	0.031271	2.85e-06	0.000685005	13.2098	TRUE
	rs2457564	A	G	0.049008	0.503126	0.010306	2.73e-06	0.000600423	11.5777	TRUE
	rs247617	A	C	-0.097445	0.288773	0.011452	4.77e-17	0.00195022	37.6562	TRUE
	rs2672263	G	C	-0.18399	0.02029	0.036797	8.17e-07	0.000672927	12.9767	TRUE
	rs2737637	C	T	-0.129354	0.961852	0.027436	3.32e-06	0.00061396	11.8389	TRUE
	rs28483956	A	G	-0.095123	0.091001	0.017967	1.77e-07	0.000748481	14.4348	TRUE
	rs2980860	G	A	-0.072499	0.48076	0.010285	3.61e-12	0.00131208	25.3183	FALSE
	rs34482346	C	G	-0.100289	0.120191	0.015912	5.1e-10	0.00106357	20.5179	TRUE
	rs429358	C	T	0.118848	0.168024	0.013842	2.5e-17	0.00197454	38.1266	TRUE
	rs4296389	T	C	-0.106868	0.320104	0.010975	7.73e-22	0.00248559	48.0191	TRUE
	rs4796701	C	G	0.050476	0.469674	0.010901	4.95e-06	0.000634613	12.2374	FALSE
	rs4932821	A	G	-0.055415	0.747246	0.01186	4.06e-06	0.000579984	11.1834	TRUE
	rs536141	A	C	-0.052096	0.479174	0.010347	6.85e-07	0.000677321	13.0615	TRUE
	rs67702903	T	C	0.055379	0.30663	0.011728	3.2e-06	0.000652033	12.5735	TRUE
	rs7247905	A	G	-0.176988	0.025746	0.032879	1.1e-07	0.000785723	15.1536	TRUE
	rs72660594	C	T	-0.212291	0.035214	0.028823	3.77e-13	0.00153112	29.5515	TRUE
	rs72836561	T	C	0.210495	0.024935	0.035857	7.06e-09	0.00107727	20.7826	TRUE
	rs72999033	T	C	-0.179766	0.061184	0.021397	1.17e-16	0.00185624	35.8381	TRUE
	rs73214679	C	T	-0.057057	0.347442	0.011476	9.42e-07	0.000738107	14.2346	TRUE
	rs79225634	T	C	0.074759	0.353218	0.010808	9.01e-12	0.00127681	24.6369	TRUE
	rs9472125	T	C	-0.079316	0.166579	0.016127	1.23e-06	0.000873386	16.8457	TRUE
	rs964184	C	G	-0.230933	0.857677	0.014495	1.16e-55	0.00650985	126.273	TRUE
Chylomicrons and extremely large VLDL particles	rs10097671	T	C	0.033628	0.078547	0.00737485	1e-06	8.18474e-05	9.41944	FALSE	Borges CM	115078	European
	rs10455872	G	A	-0.242907	0.07899	0.00734875	1e-200	0.00429256	496.1	TRUE
	rs10472290	T	G	-0.0249133	0.198771	0.0049966	5.3e-07	9.8849e-05	11.3763	TRUE
	rs10750766	A	C	0.023142	0.70979	0.00437586	4.2e-08	0.000110317	12.6963	TRUE
	rs10761752	C	T	-0.0364183	0.474404	0.00397646	2.3e-21	0.000330704	38.0687	TRUE
	rs10883026	T	C	-0.0200825	0.522195	0.00400831	8e-07	0.000100628	11.581	TRUE
	rs11122450	G	T	-0.0395444	0.611466	0.00407486	2.6e-23	0.000371511	42.7679	TRUE
	rs111571429	A	G	-0.0643231	0.021556	0.0138472	4.1e-06	8.72646e-05	10.0429	TRUE
	rs111909590	T	C	0.050999	0.043581	0.0097798	2e-08	0.00010841	12.4767	TRUE
	rs11249894	T	G	0.0260225	0.166718	0.00534706	2.1e-06	9.40746e-05	10.8268	TRUE
	rs113921663	A	G	-0.0460883	0.045059	0.00981323	7.7e-07	9.13986e-05	10.5187	TRUE
	rs11644601	C	T	-0.0281226	0.296692	0.00436677	1.2e-11	0.00016503	18.9941	TRUE
	rs11651280	T	G	0.04823	0.061066	0.00833957	5.9e-09	0.000133373	15.3501	TRUE
	rs11688682	C	G	-0.0205411	0.271513	0.00461575	4.4e-06	8.34564e-05	9.60463	FALSE
	rs117733303	G	A	-0.370319	0.0185	0.0147064	8.39e-142	0.00249008	287.264	TRUE
	rs11878597	C	T	0.0232136	0.450192	0.00398873	1.1e-09	0.000133381	15.351	TRUE
	rs11903847	C	T	-0.0223297	0.665068	0.00428128	2.3e-07	0.000111068	12.7827	TRUE
	rs11998606	T	C	0.0356846	0.402116	0.00414485	1.1e-16	0.000306147	35.241	TRUE
	rs12016920	C	T	-0.028531	0.19569	0.0050434	1.5e-07	0.000128123	14.7457	TRUE
	rs12419462	A	G	0.0256427	0.228748	0.00473111	1.2e-08	0.000116006	13.3511	TRUE
	rs1260326	C	T	-0.0862494	0.603982	0.00405826	3.7e-105	0.00177931	205.121	FALSE
	rs13108218	G	A	-0.0295222	0.615355	0.00411339	3.1e-14	0.000206292	23.7442	TRUE
	rs13140938	C	T	0.0394841	0.941442	0.00847626	7e-07	8.59457e-05	9.89114	FALSE
	rs13191810	T	C	0.0358103	0.312294	0.00427302	5.3e-17	0.000275412	31.702	TRUE
	rs13287131	C	T	0.0243267	0.258073	0.00456184	1.2e-07	0.00011331	13.0408	TRUE
	rs13389219	T	C	-0.0506813	0.392528	0.00406729	2.6e-37	0.000612481	70.525	TRUE
	rs139974673	C	T	0.133786	0.025918	0.0125341	9.3e-28	0.000451875	52.0235	TRUE
	rs140312320	A	G	-0.0406027	0.066996	0.00795246	2.1e-07	0.000103049	11.8596	TRUE
	rs141054404	C	T	-0.116285	0.00739	0.0236026	3.7e-07	9.91906e-05	11.4156	TRUE
	rs141505111	G	A	0.0578809	0.030046	0.0121782	1.2e-06	9.76356e-05	11.2366	TRUE
	rs144033177	C	A	0.0754432	0.015537	0.0164733	3e-06	8.70576e-05	10.0191	TRUE
	rs144147880	T	C	0.0420357	0.047036	0.00943462	1.5e-06	7.92033e-05	9.11512	FALSE
	rs144503444	C	T	0.140512	0.018253	0.0149742	3.7e-20	0.000353802	40.7286	TRUE
	rs146534110	T	G	-0.118183	0.013508	0.0171767	2.4e-12	0.000186121	21.422	TRUE
	rs1471251	T	A	0.0330129	0.397126	0.00407774	3.4e-17	0.000260929	30.0345	TRUE
	rs147858094	T	C	0.0950329	0.01318	0.0178285	4e-08	0.000117463	13.5188	TRUE
	rs149512315	A	G	0.0371978	0.064914	0.0081268	3.8e-06	8.39894e-05	9.66598	FALSE
	rs150564454	A	G	-0.124021	0.011474	0.0193786	1.1e-10	0.000174459	20.0795	TRUE
	rs150960004	T	C	0.0683502	0.022101	0.0136227	5.9e-07	0.000100968	11.6202	TRUE
	rs1716183	T	C	-0.0257158	0.177406	0.00529807	1.3e-06	9.65059e-05	11.1066	TRUE
	rs174580	G	A	0.0661563	0.351967	0.00415154	7.1e-60	0.000998255	114.99	TRUE
	rs1801689	C	A	-0.1153	0.030531	0.0115539	1.4e-25	0.00039349	45.2991	TRUE
	rs1825205	T	A	0.0239122	0.158444	0.00544179	3.1e-06	7.62426e-05	8.77437	FALSE
	rs184089815	A	G	-0.0905782	0.01643	0.015748	5.5e-09	0.000132584	15.2592	TRUE
	rs1883711	C	G	0.0682771	0.0312	0.0116804	2.7e-10	0.000140909	16.2175	TRUE
	rs2035816	G	A	-0.0378349	0.0843	0.00716718	6.9e-08	0.000110501	12.7174	TRUE
	rs2070971	T	G	0.027776	0.137057	0.00579257	1.5e-06	9.12479e-05	10.5014	TRUE
	rs2122982	A	G	-0.0271576	0.238662	0.00464806	2.4e-09	0.000134012	15.4236	TRUE
	rs213479	T	G	-0.0201198	0.468638	0.00401651	4e-07	0.000100803	11.6012	TRUE
	rs2186037	G	A	0.0292708	0.51879	0.00397784	3.6e-14	0.000213892	24.6192	TRUE
	rs2267375	T	G	0.0191482	0.58062	0.00404306	5.7e-07	8.92803e-05	10.2749	TRUE
	rs2275647	A	G	0.028232	0.351879	0.00415647	3.9e-12	0.000181774	20.9217	TRUE
	rs2302263	T	C	0.0420958	0.088118	0.00702592	2.7e-09	0.00014239	16.3881	TRUE
	rs247616	T	C	-0.0385923	0.32471	0.00425006	1.2e-20	0.000326578	37.5936	TRUE
	rs2680888	A	C	0.0304813	0.871766	0.00594888	2.5e-07	0.000103865	11.9536	TRUE
	rs2701678	G	A	0.0212442	0.762522	0.0046683	4.3e-06	8.17253e-05	9.40539	FALSE
	rs28583444	G	T	-0.0226077	0.804224	0.00501853	1.7e-06	8.04728e-05	9.26124	FALSE
	rs28601761	G	C	-0.0772465	0.420164	0.0040679	7.7e-84	0.00145372	167.532	FALSE
	rs2889	G	A	-0.0211983	0.314573	0.00431065	4.6e-07	9.68913e-05	11.1509	TRUE
	rs2915400	C	T	0.0228765	0.767812	0.00472106	6.1e-07	9.32983e-05	10.7374	TRUE
	rs2925979	C	T	-0.0310848	0.69893	0.00433149	2.9e-13	0.000203328	23.4029	TRUE
	rs2943635	T	C	0.0407163	0.679829	0.00425639	9e-22	0.000360843	41.5394	TRUE
	rs328	G	C	-0.184999	0.10031	0.00658871	2.6e-179	0.0030887	356.537	TRUE
	rs34417180	A	C	-0.0306022	0.166849	0.0053205	3.4e-09	0.000130183	14.9828	TRUE
	rs35776891	A	G	0.0222468	0.325519	0.00442681	2e-07	0.000108663	12.5058	TRUE
	rs3774866	T	G	-0.020472	0.342036	0.00424586	3.4e-07	9.4318e-05	10.8548	TRUE
	rs3812316	G	C	-0.108641	0.129264	0.00591624	6e-76	0.00132847	153.078	TRUE
	rs3860847	A	G	0.033485	0.212511	0.00487617	1.4e-12	0.00018764	21.597	TRUE
	rs3936511	G	A	0.0538842	0.192433	0.00503867	1.3e-26	0.000451212	51.9472	TRUE
	rs3963364	A	C	-0.0316	0.165061	0.00569853	5.9e-08	0.000137617	15.8386	TRUE
	rs4491981	A	C	-0.0258852	0.241217	0.00467462	3.8e-09	0.000122639	14.1145	TRUE
	rs4640235	C	T	-0.0327022	0.090157	0.00696254	3e-06	8.77243e-05	10.0958	TRUE
	rs4698315	C	G	0.0223385	0.66337	0.00421989	6e-08	0.000111434	12.8248	TRUE
	rs4704834	G	A	0.0353624	0.644037	0.00414505	2.3e-19	0.000286681	32.9996	TRUE
	rs4766602	C	T	0.0227784	0.41546	0.00411283	1.6e-08	0.000126006	14.502	TRUE
	rs4969144	A	C	-0.0216947	0.52108	0.00407515	1.5e-07	0.000117456	13.5179	TRUE
	rs5020545	T	C	0.0179567	0.446921	0.00401253	1.6e-06	7.97023e-05	9.17256	FALSE
	rs55815124	A	C	0.0299184	0.132781	0.00590672	1.7e-07	0.000103072	11.8624	TRUE
	rs55960868	A	G	-0.0292263	0.197794	0.00503019	2e-09	0.000135534	15.5988	TRUE
	rs56001710	T	A	-0.0312893	0.58058	0.00415057	1.6e-15	0.000238398	27.4404	FALSE
	rs56017239	G	A	0.0486153	0.036381	0.0107642	2.2e-06	8.28564e-05	9.53557	FALSE
	rs57192995	C	G	-0.0533643	0.056299	0.00862903	3.5e-10	0.000151299	17.4135	TRUE
	rs57994353	C	T	0.019389	0.30085	0.00433264	3.2e-06	7.90735e-05	9.10019	FALSE
	rs59347135	G	C	0.0640273	0.045804	0.00976093	1.1e-11	0.000179173	20.6222	TRUE
	rs593979	C	T	-0.0179235	0.40463	0.00409312	7.5e-07	7.7391e-05	8.90654	FALSE
	rs61781371	G	C	0.0237615	0.224173	0.00476427	3.8e-07	9.81965e-05	11.3012	TRUE
	rs61838776	A	C	0.0303883	0.161115	0.00541423	8.3e-08	0.000124811	14.3645	TRUE
	rs61905307	C	T	-0.026858	0.13914	0.00578999	2.3e-06	8.64036e-05	9.94384	FALSE
	rs62397245	G	C	0.0210144	0.223122	0.00478292	4.6e-06	7.65472e-05	8.80942	FALSE
	rs632057	G	T	-0.0335348	0.627779	0.00410101	3.5e-16	0.000262784	30.2481	TRUE
	rs6505531	T	C	-0.023027	0.741952	0.00456943	9.5e-07	0.00010152	11.6837	TRUE
	rs6542680	T	C	0.0282788	0.82045	0.00521263	4.8e-08	0.000117804	13.558	TRUE
	rs6559742	A	C	0.023206	0.782845	0.00482733	1.4e-06	9.15474e-05	10.5359	TRUE
	rs676210	A	G	-0.0870877	0.205765	0.00489612	3.2e-73	0.00123946	142.81	TRUE
	rs6840875	T	C	0.0283379	0.108131	0.00643002	4.7e-06	7.74438e-05	8.91261	FALSE
	rs692992	A	G	-0.0217365	0.737309	0.00452538	3.9e-06	9.15111e-05	10.5317	TRUE
	rs6938550	A	G	-0.037399	0.914148	0.00707741	1e-07	0.000109771	12.6334	TRUE
	rs6971365	C	T	0.029379	0.292827	0.00436807	2e-12	0.000178735	20.5718	TRUE
	rs7018333	G	A	-0.0231498	0.671966	0.00424774	1e-07	0.00011813	13.5955	TRUE
	rs7133378	A	G	-0.0253389	0.319792	0.00426119	3.2e-10	0.000139664	16.0742	TRUE
	rs7140110	C	T	0.0279073	0.299371	0.00434125	5.5e-11	0.000163355	18.8014	TRUE
	rs72555385	G	A	0.0632259	0.04931	0.00922166	6.2e-12	0.000187398	21.569	TRUE
	rs72642181	A	G	-0.0227225	0.295835	0.00434307	6.9e-08	0.000107556	12.3785	TRUE
	rs72815155	G	A	0.0216058	0.334992	0.00424046	2.8e-07	0.000103992	11.9683	TRUE
	rs72836561	T	C	0.109922	0.031483	0.0113817	6.1e-23	0.000368428	42.4128	TRUE
	rs73596816	A	G	-0.122926	0.033595	0.0110374	1.8e-28	0.000490593	56.4832	TRUE
	rs7402939	C	T	0.0219578	0.623489	0.00414626	6.9e-08	0.000113184	13.0262	TRUE
	rs75308472	T	A	-0.0234645	0.186269	0.00510609	4.5e-06	8.34534e-05	9.60429	FALSE
	rs76473372	T	A	-0.0655043	0.023603	0.0134134	2e-06	9.88856e-05	11.3805	TRUE
	rs76873953	C	T	-0.0376589	0.078568	0.00742784	9e-07	0.00010267	11.8161	TRUE
	rs771203	A	G	0.0250813	0.857427	0.00569198	2.9e-06	7.69015e-05	8.85019	FALSE
	rs7722789	A	C	0.0189918	0.568936	0.00401516	3e-06	8.84581e-05	10.1803	TRUE
	rs77659400	G	C	0.0323853	0.081762	0.00749192	3e-06	7.87413e-05	9.06195	FALSE
	rs79598313	T	C	0.0983829	0.023202	0.0131908	4.5e-13	0.000219366	25.2493	TRUE
	rs8107974	T	A	-0.09048	0.075555	0.00752949	4.1e-33	0.000571807	65.8389	TRUE
	rs835273	T	A	-0.0250249	0.384862	0.0040916	3.8e-11	0.000148259	17.0636	FALSE
	rs895893	T	C	0.0370459	0.766903	0.00470237	1.9e-16	0.000245334	28.239	TRUE
	rs896311	A	G	-0.0207088	0.703273	0.00434918	1.7e-06	8.94934e-05	10.2995	TRUE
	rs9327640	G	A	-0.0181524	0.511459	0.0039849	6.5e-07	8.23341e-05	9.47546	FALSE
	rs964184	C	G	-0.202889	0.867255	0.0058544	1e-200	0.00473895	547.936	TRUE
	rs9844972	C	G	0.0409447	0.070765	0.0078835	1.3e-08	0.00011024	12.6874	TRUE
	rs9968117	T	C	-0.0297763	0.120934	0.00609001	2.5e-06	9.42565e-05	10.8477	TRUE
	rs998584	A	C	0.0265201	0.482334	0.0039692	1.1e-11	0.000175609	20.212	TRUE
Serum total HDL level	rs10015477	G	A	0.019401	0.631703	0.00384175	4.42e-07	8.75708e-05	10.0785	TRUE	Richardson TG	115082	European
	rs10162642	G	A	0.040578	0.789893	0.00455246	4.95e-19	0.000273269	31.4564	TRUE
	rs10268632	A	C	-0.0215969	0.488242	0.00369893	5.26e-09	0.000116542	13.4132	TRUE
	rs1047891	C	A	0.0231158	0.685016	0.00397262	5.93e-09	0.000115294	13.2696	TRUE
	rs1054852	A	G	-0.0317791	0.622523	0.0039937	1.76e-15	0.000237317	27.3169	TRUE
	rs10882140	G	T	-0.0190437	0.466582	0.00370325	2.71e-07	9.02606e-05	10.3881	TRUE
	rs11057469	G	A	-0.0192957	0.576115	0.00378133	3.35e-07	9.0924e-05	10.4645	TRUE
	rs115447786	C	T	0.0549358	0.95491	0.00888747	6.36e-10	0.000129943	14.9558	TRUE
	rs11751347	C	T	0.0551837	0.897743	0.00612437	2.05e-19	0.000279555	32.1801	TRUE
	rs11789603	C	T	-0.0527877	0.891178	0.00593959	6.25e-19	0.000270238	31.1074	TRUE
	rs12103674	T	C	0.0381078	0.920476	0.00682838	2.39e-08	0.000106301	12.2345	TRUE
	rs1215112	G	A	-0.0493264	0.13697	0.00537245	4.26e-20	0.000287614	33.1082	TRUE
	rs12453682	C	T	-0.0213856	0.30634	0.00402553	1.08e-07	9.71837e-05	11.185	TRUE
	rs12533197	T	G	0.0212412	0.560822	0.00374046	1.36e-08	0.000111128	12.79	TRUE
	rs12608026	T	G	-0.0722735	0.957601	0.00924146	5.26e-15	0.000212079	24.4113	TRUE
	rs12786130	C	T	-0.0269333	0.238203	0.00435246	6.09e-10	0.000131633	15.1503	TRUE
	rs13107325	C	T	0.0745959	0.925718	0.00703257	2.76e-26	0.000382642	44.0513	TRUE
	rs13389219	C	T	-0.0337066	0.607468	0.00377827	4.61e-19	0.000270912	31.185	TRUE
	rs1358980	C	T	0.0327046	0.517378	0.00371529	1.34e-18	0.000267075	30.7432	TRUE
	rs144203325	C	G	-0.0828873	0.985794	0.0162786	3.55e-07	9.6213e-05	11.0733	TRUE
	rs144503444	T	C	0.153771	0.981747	0.01391	2.08e-28	0.000423724	48.7828	TRUE
	rs147233090	C	T	0.0759128	0.97542	0.0119883	2.42e-10	0.000138167	15.9024	TRUE
	rs148233867	A	C	0.069261	0.980119	0.0132149	1.6e-07	9.34748e-05	10.7581	TRUE
	rs148964496	C	A	0.0551145	0.96843	0.0107566	2.99e-07	9.28698e-05	10.6885	TRUE
	rs150224153	C	T	0.0906426	0.970763	0.0112384	7.3e-16	0.00023319	26.8418	TRUE
	rs150429317	G	C	-0.0504203	0.959339	0.00938408	7.75e-08	9.91656e-05	11.4131	TRUE
	rs1601935	G	T	0.0979622	0.345362	0.00390785	1.11e-138	0.00216967	250.228	TRUE
	rs174578	T	A	0.0651274	0.649023	0.00385665	5.6e-64	0.000966198	111.298	TRUE
	rs1761457	A	G	-0.0280419	0.673282	0.00393947	1.09e-12	0.000172976	19.9095	TRUE
	rs17696736	A	G	0.0216361	0.569746	0.00372856	6.52e-09	0.000114753	13.2073	TRUE
	rs1799993	C	A	0.0208659	0.592323	0.00376377	2.96e-08	0.000105135	12.1003	TRUE
	rs193084249	A	G	0.107336	0.976638	0.012463	7.16e-18	0.000262866	30.2586	TRUE
	rs2066714	T	C	-0.0339425	0.87107	0.00548543	6.1e-10	0.000129388	14.8919	TRUE
	rs2070895	G	A	-0.10761	0.781321	0.00446204	1.67e-128	0.00197853	228.14	TRUE
	rs2229357	G	A	-0.028396	0.759063	0.00430067	4.04e-11	0.000147467	16.973	TRUE
	rs2245221	G	A	-0.0311264	0.441032	0.00373991	8.59e-17	0.000238844	27.4928	TRUE
	rs2267375	G	T	0.019071	0.419387	0.00375552	3.81e-07	8.85623e-05	10.1926	TRUE
	rs2297402	C	T	0.0636618	0.976208	0.0125999	4.36e-07	9.41307e-05	10.8336	TRUE
	rs2298428	C	T	0.0367169	0.817448	0.00478109	1.6e-14	0.000201177	23.1561	TRUE
	rs2302263	C	T	0.0351762	0.91188	0.0065226	6.93e-08	9.94283e-05	11.4433	TRUE
	rs2307111	T	C	-0.0248324	0.603405	0.00377563	4.8e-11	0.000147568	16.9847	TRUE
	rs2328701	G	C	0.0195394	0.430403	0.00373478	1.68e-07	9.35978e-05	10.7722	FALSE
	rs2494748	C	T	0.0201722	0.383765	0.00380169	1.12e-07	9.62317e-05	11.0754	TRUE
	rs2642438	A	G	-0.0357106	0.29615	0.00403954	9.55e-19	0.000265819	30.5986	TRUE
	rs267738	T	G	-0.0275649	0.780348	0.00445081	5.89e-10	0.000130238	14.9897	TRUE
	rs2740488	A	C	0.0438242	0.734687	0.00419046	1.35e-25	0.00037436	43.0974	TRUE
	rs2792735	G	A	0.0400779	0.27966	0.00410962	1.8e-22	0.000323577	37.2493	TRUE
	rs28818616	T	C	0.0205455	0.650232	0.00388998	1.28e-07	9.60023e-05	11.049	TRUE
	rs2925979	T	C	-0.0379963	0.301051	0.00400259	2.25e-21	0.000303786	34.9704	TRUE
	rs2943650	C	T	0.0407191	0.355246	0.00384791	3.61e-26	0.000379769	43.7204	TRUE
	rs2954029	A	T	-0.0230716	0.535109	0.00370263	4.63e-10	0.000132419	15.2407	FALSE
	rs2978615	C	T	0.0199186	0.509802	0.00370267	7.47e-08	9.91495e-05	11.4113	TRUE
	rs3110291	A	C	0.0240902	0.79809	0.00466097	2.36e-07	9.3517e-05	10.7629	TRUE
	rs328	C	G	-0.157425	0.899693	0.00612053	6.84e-146	0.00223652	257.956	TRUE
	rs35184771	G	T	0.0386494	0.647229	0.00385033	1.04e-23	0.000341064	39.2631	TRUE
	rs35493868	C	G	-0.0338309	0.796325	0.00459428	1.79e-13	0.000185633	21.3666	TRUE
	rs35633876	G	T	0.0234348	0.518142	0.00370538	2.54e-10	0.000137117	15.7816	TRUE
	rs3735687	A	G	0.0246233	0.577195	0.00375048	5.19e-11	0.000147964	17.0302	TRUE
	rs3768321	G	T	0.0420588	0.803476	0.00464887	1.47e-19	0.00027932	32.1531	TRUE
	rs3936511	A	G	0.0398507	0.80757	0.00467928	1.65e-17	0.000246788	28.4074	TRUE
	rs4142978	C	G	0.0240007	0.1995	0.00469938	3.27e-07	9.19924e-05	10.5875	TRUE
	rs4239651	T	C	-0.0359358	0.205758	0.0045675	3.61e-15	0.00021104	24.2916	TRUE
	rs4240624	G	A	-0.0929179	0.0907662	0.00642056	1.82e-47	0.000712522	82.0555	TRUE
	rs4548577	T	C	0.0228034	0.230032	0.00437451	1.86e-07	9.21001e-05	10.5999	TRUE
	rs4846921	G	A	-0.0488588	0.386768	0.00378365	3.8e-38	0.000566188	65.1939	TRUE
	rs4969141	C	T	-0.0231374	0.510472	0.00370183	4.1e-10	0.000133776	15.397	TRUE
	rs4985155	A	G	0.0237098	0.665111	0.00388888	1.08e-09	0.000125213	14.4114	TRUE
	rs4986970	A	T	0.0925782	0.966081	0.0101853	9.96e-20	0.00028085	32.3293	TRUE
	rs5030789	A	G	-0.0201602	0.432674	0.00373516	6.76e-08	9.97661e-05	11.4822	TRUE
	rs5167	T	G	-0.0438314	0.647734	0.00385854	6.65e-30	0.000438367	50.4694	TRUE
	rs559355	A	T	0.0515174	0.842021	0.00507104	3.02e-24	0.000353045	40.6428	TRUE
	rs57912727	A	C	0.0285085	0.863315	0.0053912	1.24e-07	9.59045e-05	11.0377	TRUE
	rs59104589	C	T	-0.0200928	0.641164	0.00384603	1.75e-07	9.28851e-05	10.6902	TRUE
	rs59347135	C	G	0.0766144	0.954197	0.00906721	2.92e-17	0.000256539	29.53	TRUE
	rs6073958	T	C	0.073578	0.801269	0.00463143	7.84e-57	0.000862065	99.292	TRUE
	rs6075076	T	C	0.0258931	0.833861	0.00497353	1.93e-07	9.28824e-05	10.6899	TRUE
	rs60847460	C	T	0.0363258	0.85667	0.00528552	6.3e-12	0.000162025	18.6488	TRUE
	rs61805076	T	C	0.0291046	0.66595	0.00390554	9.18e-14	0.000188441	21.6899	TRUE
	rs61854123	G	A	-0.0322556	0.757329	0.00432414	8.69e-14	0.000191211	22.0088	TRUE
	rs62101705	C	T	0.0870704	0.98636	0.0162001	7.67e-08	0.000101998	11.7391	TRUE
	rs676210	G	A	-0.0695041	0.794234	0.00454832	1.02e-52	0.000789483	90.9255	TRUE
	rs688671	A	G	0.0245753	0.732867	0.00418765	4.4e-09	0.000118236	13.6082	TRUE
	rs71336055	C	T	-0.0336677	0.880275	0.00569199	3.32e-09	0.000119462	13.7493	TRUE
	rs7134375	C	A	-0.0234696	0.569789	0.0037187	2.77e-10	0.000135023	15.5405	TRUE
	rs7136506	T	C	0.0405569	0.784226	0.0045649	6.42e-19	0.000278336	32.0399	TRUE
	rs71458878	A	G	-0.0258901	0.758166	0.00430701	1.84e-09	0.000122899	14.145	TRUE
	rs71562509	G	T	-0.0191111	0.406663	0.00376499	3.85e-07	8.81267e-05	10.1425	TRUE
	rs7241918	G	T	-0.0758268	0.1771	0.0048462	3.5e-55	0.000837936	96.5106	TRUE
	rs72786786	G	A	-0.191724	0.687699	0.00403973	0	0.0078945	915.728	FALSE
	rs72836561	C	T	0.156257	0.968518	0.0105667	1.76e-49	0.000744473	85.7378	TRUE
	rs7308864	A	G	-0.0261842	0.476708	0.0036858	1.21e-12	0.000171031	19.6856	TRUE
	rs73243877	A	G	0.0264887	0.83288	0.00495227	8.85e-08	9.76635e-05	11.2402	TRUE
	rs737337	T	C	0.0603308	0.923211	0.00692598	3.02e-18	0.000258035	29.7023	TRUE
	rs74444445	T	C	0.0637913	0.975997	0.0125275	3.54e-07	9.53316e-05	10.9718	TRUE
	rs75627662	C	T	0.0327726	0.79394	0.00456442	6.97e-13	0.000175713	20.2246	TRUE
	rs75911530	G	A	0.15844	0.967115	0.0108354	2.02e-48	0.000798373	91.9501	TRUE
	rs76385829	C	T	-0.0523593	0.943629	0.0080108	6.31e-11	0.000145829	16.7845	TRUE
	rs77960347	A	G	-0.253103	0.986766	0.0161197	1.48e-55	0.000836565	96.3526	TRUE
	rs7810507	G	A	0.0300341	0.718915	0.00410078	2.41e-13	0.000182282	20.9809	TRUE
	rs7832515	A	G	-0.0256957	0.812183	0.0047538	6.47e-08	0.000100719	11.5919	TRUE
	rs7845090	G	A	-0.0235395	0.290632	0.00408034	7.97e-09	0.000114238	13.148	TRUE
	rs80041799	C	T	-0.0948221	0.987219	0.016401	7.4e-09	0.000113448	13.0571	TRUE
	rs8058512	C	T	0.0270009	0.275955	0.0041242	5.87e-11	0.000145667	16.7658	TRUE
	rs921919	G	A	0.042235	0.33049	0.00400704	5.64e-26	0.000394694	45.4393	TRUE
	rs9265559	C	G	0.0287989	0.649153	0.00391871	2e-13	0.000188893	21.742	TRUE
	rs941507	G	C	0.0203116	0.53919	0.00371193	4.45e-08	0.000102507	11.7977	FALSE
	rs9429767	G	A	0.0241065	0.802522	0.00469129	2.77e-07	9.20967e-05	10.5995	TRUE
	rs9491697	A	G	0.0273328	0.536383	0.00371524	1.88e-13	0.000185782	21.3837	TRUE
	rs964184	G	C	-0.0871971	0.13274	0.0054353	6.43e-58	0.000875297	100.817	TRUE
	rs967645	C	T	0.0195386	0.483495	0.00368912	1.18e-07	9.53352e-05	10.9722	TRUE
	rs9980195	T	C	0.0187834	0.473662	0.00369649	3.75e-07	8.79593e-05	10.1232	TRUE
Serum total LDL level	rs102275	T	C	0.0504775	0.65021	0.00429971	7.97e-32	0.000579504	67.1455	TRUE	Richardson TG	115082	European
	rs10260606	G	C	-0.0285853	0.817348	0.00531027	7.32e-08	0.000121988	14.1279	TRUE
	rs10423694	C	T	0.0231817	0.297191	0.00454861	3.46e-07	0.000112244	12.9993	TRUE
	rs10504255	G	A	0.0235828	0.337042	0.00436609	6.61e-08	0.000124268	14.3921	TRUE
	rs10953298	C	T	0.0271287	0.764437	0.00487088	2.55e-08	0.000132528	15.3487	TRUE
	rs11127048	G	A	0.0405842	0.385884	0.0042888	3e-21	0.00039032	45.2167	TRUE
	rs111278137	G	A	0.136081	0.978386	0.0145992	1.15e-20	0.000391598	45.3648	TRUE
	rs11206517	T	G	-0.0956948	0.966988	0.0115078	9.13e-17	0.000292327	33.8614	TRUE
	rs112875651	G	A	0.0550911	0.607621	0.0042705	4.48e-38	0.000723605	83.8541	FALSE
	rs115740542	T	C	0.0610428	0.926399	0.00791172	1.21e-14	0.000254068	29.4286	TRUE
	rs11591147	G	T	0.303215	0.982543	0.0156646	1.79e-83	0.00157697	182.901	TRUE
	rs11621792	C	T	-0.0280458	0.546187	0.00415236	1.44e-11	0.000194964	22.5812	TRUE
	rs118147862	G	A	0.442866	0.954236	0.0101283	0	0.00856494	1000.39	FALSE
	rs118170342	T	C	-0.132565	0.959232	0.0105361	2.65e-36	0.000687228	79.6357	TRUE
	rs12151108	G	A	0.145434	0.880323	0.0063134	2.04e-117	0.00222836	258.62	TRUE
	rs12198895	G	T	-0.0233389	0.717801	0.0045648	3.17e-07	0.000110337	12.7784	TRUE
	rs12620918	T	C	-0.028205	0.826015	0.0054343	2.1e-07	0.000114328	13.2407	TRUE
	rs12740374	G	T	0.117191	0.778936	0.00494617	4.23e-124	0.00236488	274.502	TRUE
	rs13278097	C	T	-0.0244543	0.711058	0.00453644	7.02e-08	0.000122864	14.2294	TRUE
	rs140798831	T	C	0.0293174	0.343186	0.0043418	1.45e-11	0.000193742	22.4396	TRUE
	rs1461729	A	G	-0.0610586	0.100763	0.00683846	4.31e-19	0.000337807	39.1313	TRUE
	rs147711004	G	A	-0.132107	0.963962	0.0112509	7.77e-32	0.000606279	70.2497	TRUE
	rs1499279	T	G	0.068024	0.958377	0.0103339	4.62e-11	0.000184584	21.3788	TRUE
	rs1873976	G	A	0.0221485	0.604603	0.00424771	1.85e-07	0.000117271	13.5816	TRUE
	rs1883711	G	C	-0.0913349	0.968793	0.0120795	4e-14	0.000252207	29.2129	TRUE
	rs1895233	G	T	-0.0247904	0.455224	0.00414156	2.15e-09	0.000152409	17.6516	TRUE
	rs261290	T	C	0.0244908	0.345355	0.00433486	1.61e-08	0.000135606	15.7053	TRUE
	rs2618566	G	T	0.0231979	0.339706	0.0043421	9.16e-08	0.000120709	13.9797	TRUE
	rs2738447	A	C	-0.0303741	0.40682	0.00418342	3.85e-13	0.000222636	25.787	TRUE
	rs2740488	A	C	0.0328926	0.734687	0.00466862	1.85e-12	0.000210891	24.4263	TRUE
	rs2784259	A	T	-0.0231494	0.326397	0.0043955	1.39e-07	0.000117823	13.6455	TRUE
	rs2986164	G	A	0.0234668	0.464174	0.00449456	1.78e-07	0.000136966	15.8628	TRUE
	rs34042070	C	G	-0.0425805	0.813022	0.00529538	8.91e-16	0.000275622	31.9259	TRUE
	rs34193381	G	A	-0.0514885	0.954059	0.00996392	2.37e-07	0.000116197	13.4572	TRUE
	rs3751521	A	G	0.0212118	0.561204	0.00415574	3.32e-07	0.0001108	12.832	TRUE
	rs3777411	C	T	0.0407614	0.849265	0.00574803	1.33e-12	0.000212694	24.6352	TRUE
	rs3846662	A	G	-0.0543489	0.575889	0.00416256	5.83e-39	0.000721439	83.603	TRUE
	rs4299376	G	T	0.0466498	0.323723	0.0044034	3.18e-26	0.000476429	55.1967	TRUE
	rs472495	G	T	-0.0345683	0.350879	0.00430308	9.48e-16	0.000272169	31.5258	TRUE
	rs4766578	T	A	-0.0263192	0.496766	0.00411969	1.67e-10	0.000173168	20.0563	FALSE
	rs4810479	C	T	0.0294758	0.249783	0.00474979	5.45e-10	0.00016281	18.8565	TRUE
	rs525028	G	A	0.0358604	0.291449	0.00454536	3.04e-15	0.000265561	30.7601	TRUE
	rs553427	C	T	-0.0330153	0.482963	0.00411175	9.79e-16	0.000272186	31.5277	TRUE
	rs55714927	C	T	0.0371578	0.809006	0.0052294	1.2e-12	0.00021334	24.71	TRUE
	rs562338	A	G	-0.105597	0.180384	0.00533767	4.14e-87	0.00164859	191.222	TRUE
	rs56325564	G	A	-0.0334417	0.517309	0.00414314	6.94e-16	0.000279252	32.3464	TRUE
	rs58542926	C	T	0.102066	0.925601	0.00781943	6.12e-39	0.000717386	83.133	TRUE
	rs59379014	C	T	-0.0619681	0.927136	0.00790159	4.42e-15	0.000259414	30.0479	TRUE
	rs59950280	G	A	-0.0254056	0.668507	0.00442361	9.29e-09	0.000143034	16.5657	TRUE
	rs6882345	G	A	-0.0347616	0.367164	0.00426019	3.36e-16	0.00028077	32.5223	TRUE
	rs6920309	C	T	0.022095	0.543151	0.00414082	9.51e-08	0.000121138	14.0295	TRUE
	rs7254892	G	A	0.440033	0.968066	0.0116661	0	0.00598589	697.34	FALSE
	rs72631343	C	G	0.0380835	0.870979	0.00613599	5.42e-10	0.000162983	18.8765	TRUE
	rs7534572	C	G	-0.0303608	0.35253	0.00429675	1.59e-12	0.000210398	24.3692	TRUE
	rs77542162	A	G	-0.119317	0.977334	0.0138295	6.26e-18	0.000315372	36.5315	TRUE
Serum Total cholesterol level	rs12898997	T	C	0.0203411	0.668728	0.00425601	1.3e-06	9.16607e-05	10.5489	FALSE	Borges CM	115078	European
	rs112875651	A	G	-0.0482053	0.392383	0.00415174	1.7e-32	0.000554025	63.7904	FALSE
	rs11127048	A	G	-0.0353702	0.61412	0.00417022	1.7e-17	0.00029647	34.1267	TRUE
	rs4766578	A	T	0.0304302	0.503247	0.00400555	2.6e-15	0.00023149	26.6451	FALSE
	rs2943650	T	C	-0.0220515	0.644755	0.00417007	3.1e-08	0.000111378	12.8183	TRUE
	rs11621792	T	C	0.0239578	0.453802	0.0040379	3.6e-10	0.000142269	16.3741	TRUE
	rs7202323	G	T	-0.0213712	0.229923	0.00473994	3.6e-06	8.08676e-05	9.30667	FALSE
	rs12740374	T	G	-0.0929409	0.221059	0.00480921	1.7e-84	0.0014874	171.419	TRUE
	rs10953298	T	C	-0.0247862	0.235558	0.00473576	2.1e-07	0.000110627	12.732	TRUE
	rs72997616	A	C	-0.037884	0.094103	0.00688055	5.3e-08	0.000122347	14.0809	TRUE
	rs12472790	A	G	0.0195715	0.495673	0.00400507	3.8e-07	9.57537e-05	11.02	TRUE
	rs525028	A	G	-0.035615	0.708552	0.00441909	1.6e-16	0.000261938	30.1507	TRUE
	rs1107851	C	T	-0.0244532	0.464885	0.00401621	5.4e-10	0.000148752	17.1204	TRUE
	rs1800961	T	C	-0.0805672	0.030197	0.0116769	2.9e-12	0.000190092	21.8792	TRUE
	rs55714927	T	C	-0.0253662	0.191001	0.00508469	2.7e-07	9.94247e-05	11.4425	TRUE
	rs77542162	G	A	0.118862	0.022667	0.0134466	4e-18	0.000312984	36.0283	TRUE
	rs11789603	T	C	0.0418447	0.108813	0.00643476	8.7e-11	0.000169797	19.5429	TRUE
	rs13107325	T	C	-0.0383423	0.074284	0.00762255	2.7e-07	0.000101095	11.6348	TRUE
	rs1883711	C	G	0.0840282	0.0312	0.0117472	1.3e-13	0.000213422	24.565	TRUE
	rs13108218	G	A	-0.0186826	0.615355	0.00413886	3.7e-06	8.26153e-05	9.50782	FALSE
	rs1293261	T	A	0.0216733	0.525195	0.0039978	1.2e-08	0.000117135	13.481	FALSE
	rs3768321	T	G	-0.0243369	0.19653	0.00503854	5.5e-07	9.35253e-05	10.7635	TRUE
	rs41290120	A	G	-0.371449	0.049091	0.00926994	1e-200	0.00644079	745.985	TRUE
	rs4299376	T	G	-0.0428972	0.676279	0.00428182	6.1e-25	0.00040286	46.3783	TRUE
	rs72805692	G	A	-0.0301907	0.114388	0.00628625	3e-06	9.23358e-05	10.6266	TRUE
	rs62251256	T	C	-0.079103	0.018086	0.0163527	9.9e-07	0.000111122	12.789	TRUE
	rs73024931	A	G	-0.0276572	0.157789	0.00553892	3.5e-07	0.000101652	11.6988	TRUE
	rs11667604	A	T	-0.018874	0.399142	0.00409291	4e-06	8.54333e-05	9.83216	FALSE
	rs1864163	A	G	-0.0465851	0.26131	0.0045502	3.2e-26	0.000418902	48.2258	TRUE
	rs117966330	T	C	0.0371035	0.089225	0.00750102	1.3e-06	0.000111874	12.8754	TRUE
	rs7534572	G	C	0.0420945	0.647484	0.00417785	2.5e-25	0.000404444	46.5606	TRUE
	rs79220007	C	T	-0.050516	0.076081	0.00754059	1.8e-11	0.000179378	20.6458	TRUE
	rs58542926	T	C	-0.0982855	0.074402	0.00760933	3e-39	0.000665252	76.6055	TRUE
	rs848445	C	T	-0.0210735	0.713022	0.00441906	3.7e-06	9.08709e-05	10.458	TRUE
	rs41289512	G	C	0.0834202	0.042302	0.00987823	1.1e-17	0.000281924	32.4518	TRUE
	rs73147887	G	C	0.0229532	0.224218	0.00487295	4.6e-06	9.16424e-05	10.5468	TRUE
	rs77960347	G	A	0.190079	0.013239	0.0174651	7.6e-28	0.000471993	54.3407	TRUE
	rs10838724	T	G	-0.0261546	0.36878	0.00419093	1.8e-10	0.000159237	18.3273	TRUE
	rs335321	A	G	-0.0208883	0.733239	0.00452589	3.9e-06	8.53442e-05	9.82191	FALSE
	rs12151108	A	G	-0.132111	0.119677	0.00614387	2.6e-104	0.00183878	211.99	TRUE
	rs72836561	T	C	-0.0763491	0.031483	0.0114495	1.7e-11	0.000177742	20.4575	TRUE
	rs261290	C	T	-0.078138	0.654642	0.00421371	1.5e-79	0.00138038	159.068	TRUE
	rs1499279	G	T	-0.0523464	0.04162	0.010048	4.6e-07	0.000109298	12.579	TRUE
	rs56325564	A	G	0.0289563	0.482712	0.00402858	7e-14	0.000209366	24.0981	TRUE
	rs1461729	G	A	0.0754733	0.899229	0.00664826	3.3e-31	0.00051617	59.4294	TRUE
	rs865716	T	A	-0.0192362	0.499036	0.00403434	5.2e-07	9.25075e-05	10.6464	FALSE
	rs12620918	C	T	0.025003	0.173979	0.00528438	4.5e-06	8.98405e-05	10.3394	TRUE
	rs2737263	T	G	-0.0205338	0.279917	0.00445056	3.6e-06	8.49866e-05	9.78075	FALSE
	rs13278097	T	C	0.0236924	0.288947	0.00441047	6.7e-08	0.000115329	13.2731	TRUE
	rs111278137	A	G	-0.113707	0.021615	0.014207	9.1e-16	0.000273426	31.4733	TRUE
	rs6882345	A	G	0.0359238	0.632845	0.00414212	3.7e-18	0.000299855	34.5165	TRUE
	rs7746472	T	A	-0.0244709	0.179137	0.00523853	9e-07	8.80554e-05	10.134	TRUE
	rs12662901	C	T	-0.0194705	0.574337	0.00406216	1.6e-06	9.26802e-05	10.6663	TRUE
	rs1500188	G	A	-0.0242707	0.450398	0.00402644	1.3e-09	0.000145817	16.7825	TRUE
	rs460014	A	G	-0.0223916	0.270757	0.00455956	8.4e-07	9.8997e-05	11.3933	TRUE
	rs3777411	T	C	-0.0405292	0.150744	0.00558926	6.4e-13	0.000210288	24.2042	TRUE
	rs10176901	A	G	-0.0210281	0.604163	0.00409058	1.1e-07	0.000105748	12.1703	TRUE
	rs3846662	G	A	0.0521026	0.424112	0.00404723	7.5e-39	0.000663036	76.3502	TRUE
	rs55709272	C	T	-0.0174045	0.437363	0.00404019	4.5e-06	7.45407e-05	8.57848	FALSE
	rs102275	C	T	-0.0660426	0.349784	0.00418036	3.7e-59	0.000991987	114.267	TRUE
	rs11854242	T	C	-0.030255	0.275071	0.00450512	7.6e-13	0.00018253	21.0087	TRUE
	rs2610992	G	A	-0.0186969	0.648954	0.00423165	3.1e-06	7.96374e-05	9.16509	FALSE
	rs562338	G	A	0.098242	0.819635	0.00519045	3.1e-83	0.00142681	164.427	TRUE
	rs72631343	G	C	-0.0346131	0.129021	0.0059663	3.5e-09	0.000134632	15.495	TRUE
	rs496654	C	A	0.0311732	0.51724	0.00399858	1.2e-15	0.000242653	27.9303	TRUE
	rs11065358	C	T	-0.0272454	0.661892	0.00424355	1.8e-10	0.000166123	19.1199	TRUE
	rs7540356	G	A	-0.0206824	0.420367	0.00406211	3.3e-06	0.000104228	11.9954	TRUE
	rs2618566	T	G	-0.0219844	0.660287	0.0042221	1.9e-08	0.000108411	12.4769	TRUE
	rs12198895	T	G	0.0237977	0.282191	0.00443883	8.4e-08	0.000114715	13.2025	TRUE
	rs73013176	C	T	-0.127568	0.011282	0.0192153	6.7e-12	0.000181527	20.8932	TRUE
	rs10260606	C	G	0.0260696	0.182659	0.00516289	1e-07	0.000101464	11.6773	TRUE
	rs78859670	C	T	0.0692723	0.016276	0.0157981	4.3e-06	7.68317e-05	8.84216	FALSE
	rs2642438	G	A	0.0318207	0.703836	0.00437814	5e-14	0.000211068	24.294	TRUE
	rs2740488	C	A	-0.0425254	0.265313	0.00453947	2.8e-20	0.000352499	40.5785	TRUE
	rs4860948	A	T	0.0255436	0.244346	0.00466595	1.9e-08	0.000120474	13.8653	TRUE
	rs2326077	T	C	-0.0224173	0.663239	0.00423777	4.6e-08	0.000112243	12.9179	TRUE
	rs3794695	T	C	0.0349478	0.189016	0.00511113	2.3e-12	0.000187219	21.5485	TRUE
	rs9304381	T	C	0.0483354	0.818411	0.00519129	3e-21	0.00034721	39.9694	TRUE
	rs9616847	T	A	0.0204161	0.388281	0.00412211	1.6e-06	9.90019e-05	11.3939	TRUE
	rs4307732	A	G	0.0364447	0.105928	0.00651417	2.6e-08	0.000125792	14.4774	TRUE
	rs11591147	T	G	-0.273043	0.017458	0.0152309	1.4e-74	0.00127881	147.349	TRUE
	rs1057558	C	T	-0.0280556	0.220311	0.00482698	7.2e-10	0.000135206	15.5611	TRUE
	rs112382383	G	A	-0.0624525	0.023906	0.0133041	1.5e-06	9.10119e-05	10.4742	TRUE
	rs6987810	T	C	0.0206538	0.682262	0.00430044	3e-06	9.24741e-05	10.6425	TRUE
	rs4008004	A	C	0.0272269	0.221868	0.00483294	5e-09	0.000127981	14.7294	TRUE
	rs633695	G	A	0.0587261	0.29236	0.00441179	3.6e-39	0.000713498	82.1651	TRUE
	rs11206517	G	T	0.0851169	0.033009	0.0111899	1.7e-14	0.000231252	26.6178	TRUE
	rs34101748	A	G	-0.0473258	0.046359	0.00985644	1e-06	9.90182e-05	11.3957	TRUE
	rs17699030	G	A	-0.0651514	0.033712	0.0110409	2.2e-09	0.000138273	15.9141	TRUE
	rs2792735	A	G	-0.0320407	0.720334	0.00445386	1.6e-13	0.000206813	23.8041	TRUE
	rs472495	T	G	0.0308054	0.649117	0.00418399	9.8e-14	0.000216142	24.8781	TRUE
	rs36018387	T	C	-0.0403666	0.10509	0.00654162	1.3e-10	0.000153245	17.6375	TRUE
	rs111784051	G	T	-0.374931	0.030353	0.0117206	1e-200	0.00413731	478.083	TRUE
	rs7968813	G	A	-0.0206318	0.38094	0.0041805	8.8e-07	0.000100384	11.5529	TRUE
	rs117355956	A	G	-0.0568549	0.027961	0.0122114	4.6e-06	8.78562e-05	10.111	TRUE
	rs2066714	C	T	0.0292181	0.128934	0.00594223	3.8e-07	9.58788e-05	11.0344	TRUE
	rs150064030	A	G	-0.0367245	0.071159	0.00790355	2.9e-06	8.91421e-05	10.259	TRUE
Triglycerides	rs2240466	A	G	-0.122769	0.122916	0.00301848	1e-200	0.0016249	717.771	TRUE	Richardson,Tom	441016	European
	rs343	A	C	-0.141493	0.083129	0.00361052	1e-200	0.00152592	673.979	TRUE
	rs4665972	C	T	-0.10025	0.604587	0.00203577	1e-200	0.00240258	1062.12	TRUE
	rs480823	C	T	0.15572	0.078996	0.00371974	1e-200	0.00176423	779.426	TRUE
	rs483082	T	G	0.0862119	0.23535	0.00234474	1e-200	0.00133755	590.67	TRUE
	rs61905078	C	A	0.199898	0.073841	0.00379494	1e-200	0.00273275	1208.48	TRUE
	rs6999569	G	A	-0.0860885	0.470737	0.00198061	1e-200	0.00184646	815.822	TRUE
	rs9436661	G	T	-0.0777322	0.352919	0.00207793	1e-200	0.00137986	609.379	TRUE
	rs676210	A	G	-0.0735169	0.205293	0.00244968	7.1e-198	0.00088177	389.216	TRUE
	rs58542926	T	C	-0.103184	0.074608	0.00378074	5.3e-164	0.000735082	324.42	TRUE
	rs11122450	G	T	-0.0481745	0.611733	0.0020373	1.3e-123	0.000551222	243.231	TRUE
	rs7000494	C	G	0.136538	0.030042	0.00584159	8e-121	0.000543236	239.705	TRUE
	rs174566	G	A	0.0485019	0.34974	0.00207982	2.8e-120	0.000534995	236.067	TRUE
	rs112259268	A	C	0.139849	0.028291	0.00601368	1.3e-119	0.000537654	237.241	TRUE
	rs150423652	T	G	0.285824	0.006675	0.0122924	1.4e-119	0.000541677	239.016	TRUE
	rs139974673	C	T	0.143073	0.026131	0.00623867	2.2e-116	0.000520921	229.853	TRUE
	rs308	G	T	-0.159413	0.020597	0.00698442	2.6e-115	0.00051264	226.198	TRUE
	rs6073958	C	T	0.0556952	0.198674	0.00249344	1.6e-110	0.000493839	217.898	TRUE
	rs998584	A	C	0.0401182	0.482727	0.00198999	2.2e-90	0.000401887	177.309	TRUE
	rs75609851	A	G	-0.199116	0.01048	0.0100401	1.6e-87	0.000411148	181.397	TRUE
	rs1077835	G	A	0.0473668	0.220459	0.00240452	2.2e-86	0.00038558	170.112	TRUE
	rs2943645	T	C	0.0402918	0.646594	0.00207151	2.9e-84	0.00037097	163.664	TRUE
	rs13389219	T	C	-0.0376242	0.392551	0.00202704	6.6e-77	0.000337552	148.915	TRUE
	rs28383314	C	T	0.0379005	0.624109	0.00204671	1.5e-76	0.000336986	148.666	TRUE
	rs3936511	G	A	0.0461274	0.19191	0.00252163	9.5e-75	0.000329971	145.57	TRUE
	rs78484485	A	G	-0.0758529	0.054016	0.00439863	1.2e-66	0.000294002	129.697	TRUE
	rs3775228	T	C	0.0338197	0.399717	0.00203602	5.8e-62	0.00027444	121.065	TRUE
	rs4731701	T	C	-0.0325803	0.493088	0.00198921	2.7e-60	0.000265318	117.04	TRUE
	rs10822163	G	C	-0.0321674	0.473369	0.00199059	9.7e-59	0.000257952	113.79	FALSE
	rs6882076	C	T	0.0331011	0.634285	0.00206122	4.9e-58	0.000254163	112.118	TRUE
	rs2068888	A	G	-0.0318216	0.450732	0.00199589	3.2e-57	0.000250696	110.588	TRUE
	rs12446515	T	C	-0.0334207	0.322889	0.00213589	3.5e-55	0.000244199	107.722	TRUE
	rs2043085	C	T	-0.0308028	0.612184	0.00204157	1.9e-51	0.000225262	99.3661	TRUE
	rs2925979	C	T	-0.0322092	0.699976	0.00217095	8.5e-50	0.000217871	96.105	TRUE
	rs13108218	G	A	-0.0305169	0.614859	0.00205811	9.7e-50	0.000220534	97.2802	TRUE
	rs10773049	C	T	-0.0290398	0.39535	0.00203691	4.1e-46	0.000201592	88.9228	TRUE
	rs17585887	C	T	-0.0285849	0.591074	0.00201656	1.3e-45	0.000197497	87.116	TRUE
	rs72555385	G	A	0.0653776	0.048975	0.0046178	1.7e-45	0.000199078	87.8139	TRUE
	rs6916318	T	A	0.0267283	0.530533	0.0019907	4.2e-41	0.000177934	78.4856	FALSE
	rs7140110	C	T	0.0283172	0.298338	0.00217811	1.2e-38	0.000167856	74.0393	TRUE
	rs12928099	A	C	-0.0282116	0.296442	0.00218133	2.9e-38	0.000165995	73.2183	TRUE
	rs7786102	A	G	-0.0283695	0.715703	0.00220088	5.1e-38	0.00016376	72.2324	TRUE
	rs186696265	T	C	-0.104318	0.014693	0.00828522	2.4e-36	0.000157544	69.4898	TRUE
	rs2081687	C	T	-0.0261379	0.663201	0.00209126	7.6e-36	0.000152601	67.3094	TRUE
	rs2302263	T	C	0.0436112	0.088863	0.00349051	8e-36	0.000153993	67.9235	TRUE
	rs684773	C	A	0.0291133	0.766797	0.00234718	2.5e-35	0.000151564	66.8522	TRUE
	rs114165349	C	G	0.0818126	0.023157	0.00663594	6.3e-35	0.000151408	66.7829	TRUE
	rs4841580	C	T	-0.0245383	0.434941	0.00200093	1.4e-34	0.000147983	65.2724	TRUE
	rs4760254	C	G	-0.0281414	0.23908	0.00232488	1e-33	0.00014407	63.5461	TRUE
	rs12546096	G	A	0.0278972	0.252369	0.00230982	1.4e-33	0.00014684	64.768	TRUE
	rs77009508	G	A	0.0450912	0.073734	0.00379997	1.8e-32	0.000138863	61.2491	TRUE
	rs6800707	G	C	0.0298848	0.810543	0.00253832	5.3e-32	0.000137147	60.4922	TRUE
	rs4765148	T	G	-0.0251537	0.312686	0.0021456	9.7e-32	0.000135978	59.9762	TRUE
	rs326222	C	T	0.0252203	0.697957	0.00215698	1.4e-31	0.00013409	59.1437	TRUE
	rs1801689	C	A	-0.06613	0.030543	0.00577722	2.4e-30	0.00012949	57.1144	TRUE
	rs17184382	C	A	-0.0219251	0.425367	0.00201039	1.1e-27	0.0001175	51.8252	TRUE
	rs73243877	G	A	0.0288117	0.168135	0.00265556	2e-27	0.000116104	51.2096	TRUE
	rs2267373	T	C	0.0215638	0.580693	0.00202145	1.4e-26	0.000113222	49.938	TRUE
	rs150564454	A	G	-0.101751	0.011556	0.00963178	4.4e-26	0.00011826	52.1604	TRUE
	rs11206374	A	G	0.0250232	0.224815	0.00237577	6.1e-26	0.000109123	48.13	TRUE
	rs34682685	A	G	0.0337428	0.104198	0.00326987	5.8e-25	0.000106276	46.874	TRUE
	rs2081194	C	G	-0.0214115	0.600934	0.00207674	6.3e-25	0.000109943	48.4915	TRUE
	rs79153732	T	C	0.0773626	0.017389	0.00758596	2e-24	0.000102263	45.104	TRUE
	rs113344423	A	G	0.0434468	0.060177	0.00428926	4.1e-24	0.000106756	47.0859	TRUE
	rs67981690	G	A	0.0299225	0.129887	0.00297454	8.3e-24	0.00010119	44.6307	TRUE
	rs1534696	A	C	-0.0197664	0.541122	0.00199128	3.2e-23	9.70169e-05	42.79	TRUE
	rs62271373	A	T	0.0419639	0.059967	0.00426588	7.8e-23	9.92675e-05	43.7827	TRUE
	rs111500536	A	G	-0.0419011	0.056946	0.00429302	1.7e-22	9.42867e-05	41.5857	TRUE
	rs4804101	T	G	0.0193079	0.439008	0.00200724	6.6e-22	9.18119e-05	40.4941	TRUE
	rs1544980	C	T	0.0238704	0.198644	0.00248513	7.6e-22	9.07027e-05	40.0048	TRUE
	rs11118310	T	A	0.0193178	0.593476	0.00202011	1.1e-21	9.00336e-05	39.7097	TRUE
	rs13269725	G	A	0.0349878	0.078416	0.0036804	2e-21	8.84653e-05	39.0179	TRUE
	rs7215055	G	A	0.0389233	0.062892	0.00410062	2.3e-21	8.92903e-05	39.3818	TRUE
	rs1760801	A	G	-0.0202981	0.295768	0.00218442	1.5e-20	8.58179e-05	37.8501	TRUE
	rs1045241	T	C	-0.0206988	0.270943	0.00224699	3.2e-20	8.46311e-05	37.3266	TRUE
	rs1009360	C	T	-0.0184832	0.41859	0.00200785	3.4e-20	8.3143e-05	36.6703	FALSE
	rs62102718	T	A	0.0202348	0.286196	0.00220142	3.9e-20	8.36451e-05	36.8917	TRUE
	rs870527	A	T	-0.0182457	0.476718	0.00198499	3.9e-20	8.30459e-05	36.6275	FALSE
	rs60856912	T	G	0.0248329	0.162906	0.00270829	4.8e-20	8.40942e-05	37.0899	TRUE
	rs71603401	G	A	0.0264991	0.136804	0.00291753	1.1e-19	8.29221e-05	36.5729	TRUE
	rs7947951	G	A	0.0193777	0.689254	0.00214074	1.4e-19	8.04247e-05	35.4713	TRUE
	rs150555490	T	C	-0.0384234	0.056868	0.00427544	2.5e-19	7.9183e-05	34.9236	TRUE
	rs72801474	A	G	-0.0307938	0.091843	0.00344154	3.6e-19	7.90922e-05	34.8835	TRUE
	rs1799831	T	C	0.024506	0.156029	0.00273953	3.7e-19	7.9082e-05	34.879	TRUE
	rs10775406	G	A	0.0206571	0.759694	0.00232578	6.6e-19	7.79008e-05	34.358	TRUE
	rs79192570	A	G	-0.0251844	0.14416	0.00283606	6.7e-19	7.82529e-05	34.5133	TRUE
	rs696825	T	C	-0.0202838	0.252926	0.00228763	7.5e-19	7.7742e-05	34.288	TRUE
	rs10750766	A	C	0.0193855	0.709959	0.00218742	7.8e-19	7.73832e-05	34.1297	TRUE
	rs2244278	A	C	-0.0269912	0.120553	0.00306133	1.2e-18	7.72382e-05	34.0658	TRUE
	rs12185242	C	A	0.0175265	0.454836	0.00199898	1.8e-18	7.6168e-05	33.5937	TRUE
	rs4969179	G	T	-0.0177529	0.60445	0.00203649	2.8e-18	7.5353e-05	33.2342	TRUE
	rs4976033	G	A	0.0177909	0.402122	0.00205178	4.3e-18	7.60968e-05	33.5623	TRUE
	rs2937124	T	C	-0.0182561	0.362769	0.00212336	8.1e-18	7.70448e-05	33.9804	TRUE
	rs3103310	G	A	0.0202549	0.241785	0.00236652	1.1e-17	7.52111e-05	33.1716	TRUE
	rs7134375	A	C	-0.0171435	0.431174	0.00200504	1.2e-17	7.20827e-05	31.7918	TRUE
	rs117233107	A	G	-0.0732317	0.015176	0.0086122	1.8e-17	8.0152e-05	35.351	TRUE
	rs61830291	C	A	0.0287484	0.095791	0.00337913	1.8e-17	7.15848e-05	31.5722	TRUE
	rs7735249	G	C	0.0268635	0.112767	0.00315997	1.9e-17	7.22013e-05	31.8441	TRUE
	rs2773469	G	A	-0.0188717	0.733286	0.00225426	5.7e-17	6.96532e-05	30.7202	TRUE
	rs79287178	A	G	0.0500946	0.031151	0.00600435	7.2e-17	7.57373e-05	33.4037	TRUE
	rs2519093	T	C	-0.021158	0.184548	0.00256189	1.5e-16	6.73685e-05	29.7125	TRUE
	rs140107293	G	A	-0.0227003	0.154707	0.00275296	1.6e-16	6.73877e-05	29.7209	TRUE
	rs2487294	T	G	0.0183191	0.723477	0.00222084	1.6e-16	6.71374e-05	29.6105	TRUE
	rs36047579	A	G	0.0259717	0.114563	0.00315106	1.7e-16	6.84231e-05	30.1776	TRUE
	rs8126001	T	C	-0.0163778	0.489576	0.00199681	2.4e-16	6.70289e-05	29.5627	TRUE
	rs12424054	A	G	0.0191212	0.232437	0.00235346	4.5e-16	6.52303e-05	28.7694	TRUE
	rs7239575	C	T	-0.0160767	0.490494	0.00199133	6.8e-16	6.45917e-05	28.4877	TRUE
	rs55966194	G	C	-0.0178509	0.281997	0.00221245	7.1e-16	6.45195e-05	28.4558	TRUE
	rs729761	G	T	0.0177868	0.711859	0.00221435	9.5e-16	6.48925e-05	28.6204	TRUE
	rs13107325	T	C	0.0300749	0.074905	0.00377743	1.7e-15	6.26766e-05	27.643	TRUE
	rs10210970	T	C	0.0232557	0.131448	0.00292788	2e-15	6.1746e-05	27.2325	FALSE
	rs1938566	T	C	-0.0212127	0.834537	0.00267054	2e-15	6.21353e-05	27.4042	TRUE
	rs7274718	A	G	0.0159491	0.598516	0.00202919	3.8e-15	6.11246e-05	26.9585	TRUE
	rs10797119	C	T	0.0157113	0.536622	0.00200465	4.6e-15	6.13802e-05	27.0712	TRUE
	rs9561643	C	A	0.0167149	0.314726	0.00214481	6.5e-15	6.02566e-05	26.5756	TRUE
	rs2071887	A	T	0.016312	0.344804	0.00209671	7.3e-15	6.01116e-05	26.5116	TRUE
	rs28577186	A	G	-0.0163428	0.664571	0.00211672	1.2e-14	5.95381e-05	26.2587	TRUE
	rs72904737	A	G	-0.0271453	0.087416	0.00351798	1.2e-14	5.87832e-05	25.9257	TRUE
	rs12880341	C	T	0.0209696	0.159023	0.00273647	1.8e-14	5.88064e-05	25.936	TRUE
	rs13354321	C	T	-0.0154305	0.409787	0.00201429	1.9e-14	5.75873e-05	25.3983	TRUE
	rs3820897	C	T	0.0197269	0.819861	0.00260304	3.5e-14	5.74732e-05	25.348	TRUE
	rs213494	T	C	0.0156106	0.648345	0.00207578	5.5e-14	5.556e-05	24.5041	TRUE
	rs1037117	A	G	0.0172213	0.254798	0.00229153	5.7e-14	5.63121e-05	24.8358	TRUE
	rs11078597	C	T	0.0191708	0.186613	0.0025513	5.7e-14	5.57853e-05	24.6035	TRUE
	rs62459095	T	C	-0.0319865	0.061781	0.00426882	6.7e-14	5.93052e-05	26.156	TRUE
	rs17326656	T	G	0.0174394	0.238472	0.00233365	7.8e-14	5.52314e-05	24.3592	TRUE
	rs41785	A	C	-0.0150445	0.417487	0.00201492	8.2e-14	5.50433e-05	24.2762	TRUE
	rs3814883	T	C	0.0148926	0.482498	0.00199657	8.7e-14	5.53794e-05	24.4245	TRUE
	rs4134963	T	C	-0.0189544	0.189878	0.00254235	9e-14	5.52644e-05	24.3737	TRUE
	rs38189	T	A	-0.0153164	0.634401	0.0020629	1.1e-13	5.44104e-05	23.9971	TRUE
	rs61729990	A	C	-0.0558488	0.017888	0.00752135	1.1e-13	5.47962e-05	24.1672	TRUE
	rs10513688	A	G	0.0247828	0.097403	0.00334924	1.4e-13	5.39967e-05	23.8146	TRUE
	rs13118477	A	G	0.0149897	0.392654	0.00203847	1.9e-13	5.35836e-05	23.6324	TRUE
	rs4253750	C	T	0.0177576	0.214455	0.00243701	3.2e-13	5.31222e-05	23.4289	TRUE
	rs1043897	T	G	-0.014664	0.415585	0.00201517	3.4e-13	5.22259e-05	23.0336	TRUE
	rs551243	C	G	0.0143952	0.469258	0.00199178	4.9e-13	5.16096e-05	22.7617	FALSE
	rs3731696	G	A	0.0218939	0.121188	0.00303176	5.1e-13	5.10507e-05	22.5152	TRUE
	rs10883026	T	C	-0.0144604	0.521569	0.00200472	5.5e-13	5.21785e-05	23.0127	TRUE
	rs1316753	C	G	-0.0145732	0.394062	0.00202974	7e-13	5.0711e-05	22.3654	TRUE
	rs698927	C	A	-0.0183059	0.183785	0.00256302	9.2e-13	5.02686e-05	22.1703	TRUE
	rs11030107	G	A	0.0160418	0.260757	0.00225693	1.2e-12	4.96054e-05	21.8778	TRUE
	rs2305746	G	A	0.0282544	0.933319	0.0039744	1.2e-12	4.96826e-05	21.9118	TRUE
	rs2691553	A	G	0.0140801	0.51063	0.00198597	1.3e-12	4.95399e-05	21.8489	TRUE
	rs61885960	A	T	-0.0313935	0.054205	0.0044298	1.4e-12	5.05261e-05	22.2838	TRUE
	rs4675812	A	G	-0.0142305	0.587882	0.00201176	1.5e-12	4.90628e-05	21.6384	TRUE
	rs37538	C	G	-0.0143974	0.601553	0.00203746	1.6e-12	4.96835e-05	21.9122	TRUE
	rs10773000	T	G	-0.0149294	0.332276	0.0021148	1.7e-12	4.94516e-05	21.8099	TRUE
	rs4761234	C	T	-0.0140236	0.484365	0.00199376	2e-12	4.91173e-05	21.6625	TRUE
	rs12440800	T	A	0.0161	0.255149	0.00229294	2.2e-12	4.92623e-05	21.7265	TRUE
	rs7704653	G	A	0.0157533	0.723029	0.00224582	2.3e-12	4.96973e-05	21.9183	TRUE
	rs742036	A	G	-0.0143632	0.375259	0.00205112	2.5e-12	4.83653e-05	21.3308	TRUE
	rs55767272	C	A	-0.0282011	0.065077	0.00403602	2.8e-12	4.83878e-05	21.3407	TRUE
	rs2812208	C	G	-0.048426	0.02089	0.00696323	3.5e-12	4.79653e-05	21.1544	TRUE
	rs921971	C	T	0.01565	0.265901	0.00225602	4e-12	4.78083e-05	21.0851	TRUE
	rs6752845	C	G	-0.0137812	0.431425	0.00200389	6.1e-12	4.65873e-05	20.5466	FALSE
	rs6792725	G	A	-0.0152543	0.692404	0.00221886	6.2e-12	4.95593e-05	21.8574	TRUE
	rs9425589	A	G	-0.0137618	0.566781	0.00200182	6.2e-12	4.65022e-05	20.5091	TRUE
	rs2092203	T	C	0.0136756	0.481154	0.00199323	6.8e-12	4.66891e-05	20.5915	TRUE
	rs1567353	G	C	0.0148202	0.307644	0.00216358	7.4e-12	4.67828e-05	20.6328	TRUE
	rs13264304	G	C	0.0189102	0.151023	0.00276507	8e-12	4.58491e-05	20.221	TRUE
	rs80276949	A	G	0.0457563	0.022677	0.00669008	8e-12	4.64008e-05	20.4644	TRUE
	rs1044808	C	G	-0.0247492	0.081237	0.00362188	8.3e-12	4.57172e-05	20.1629	TRUE
	rs2237029	A	G	-0.0139399	0.601353	0.00204019	8.3e-12	4.65841e-05	20.5452	TRUE
	rs56397607	G	A	0.0174851	0.182538	0.00257608	1.1e-11	4.56202e-05	20.1201	TRUE
	rs581080	C	G	0.0175432	0.819008	0.00258442	1.1e-11	4.5621e-05	20.1204	TRUE
	rs9480889	G	C	0.0163067	0.783137	0.0024101	1.3e-11	4.51601e-05	19.9172	TRUE
	rs11100083	C	T	-0.0160248	0.226214	0.00237585	1.5e-11	4.49496e-05	19.8243	TRUE
	rs150460588	C	T	0.0326952	0.044425	0.00484966	1.6e-11	4.53796e-05	20.0139	TRUE
	rs954244	G	C	0.015323	0.254641	0.00227424	1.6e-11	4.45637e-05	19.6541	TRUE
	rs867939	A	G	-0.0136048	0.57621	0.00202516	1.8e-11	4.51976e-05	19.9337	TRUE
	rs11240358	A	G	0.0135651	0.394026	0.00202953	2.3e-11	4.39364e-05	19.3774	TRUE
	rs970069	T	C	0.0162322	0.212039	0.00243455	2.6e-11	4.40226e-05	19.4154	TRUE
	rs10152471	A	G	-0.0135209	0.388656	0.00204778	4e-11	4.34372e-05	19.1573	FALSE
	rs140288	A	G	-0.0132623	0.566711	0.00200841	4e-11	4.31894e-05	19.0479	TRUE
	rs2382825	T	C	-0.0134774	0.622954	0.00204919	4.8e-11	4.26641e-05	18.8163	TRUE
	rs192249	G	C	-0.0137279	0.651188	0.00208903	5e-11	4.28061e-05	18.8789	TRUE
	rs10405944	C	T	-0.013209	0.483077	0.00201995	6.2e-11	4.35695e-05	19.2156	TRUE
	rs35763453	C	T	0.02845	0.058647	0.00435137	6.2e-11	4.46851e-05	19.7076	TRUE
	rs11722924	C	G	0.0129095	0.53531	0.00199093	8.9e-11	4.1456e-05	18.2834	FALSE
	rs6517522	C	T	-0.0129031	0.498138	0.00199242	9.4e-11	4.16219e-05	18.3566	TRUE
	rs13066793	G	A	-0.0224583	0.090095	0.00347278	1e-10	4.13476e-05	18.2356	TRUE
	rs2131919	G	A	0.0173511	0.164266	0.00268396	1e-10	4.13304e-05	18.228	TRUE
	rs36043408	A	G	-0.0128072	0.502153	0.00198554	1.1e-10	4.10053e-05	18.0847	TRUE
	rs117287238	A	G	-0.0394324	0.028185	0.00614684	1.4e-10	4.259e-05	18.7836	TRUE
	rs11000468	T	C	-0.0148544	0.255269	0.00231748	1.5e-10	4.19477e-05	18.5003	TRUE
	rs151235402	T	C	0.0521833	0.015827	0.00815144	1.5e-10	4.24163e-05	18.707	TRUE
	rs852388	C	G	0.0157124	0.211278	0.00245601	1.6e-10	4.11399e-05	18.144	TRUE
	rs6532798	T	C	0.013792	0.697405	0.00216353	1.8e-10	4.01422e-05	17.704	TRUE
	rs1292065	G	C	-0.0139237	0.709244	0.00218669	1.9e-10	3.99792e-05	17.6321	TRUE
	rs74090351	A	G	-0.0250097	0.068143	0.00393658	2.1e-10	3.9718e-05	17.5169	TRUE
	rs9902027	T	C	-0.0151609	0.77437	0.00238645	2.1e-10	4.01602e-05	17.7119	TRUE
	rs72784786	A	G	0.0263468	0.060638	0.00416714	2.6e-10	3.95397e-05	17.4383	TRUE
	rs10899490	T	C	-0.0170082	0.161369	0.00269347	2.7e-10	3.91478e-05	17.2654	TRUE
	rs12926107	G	A	0.0126364	0.454903	0.0020014	2.7e-10	3.95949e-05	17.4626	TRUE
	rs3974807	T	C	0.0159776	0.189267	0.00253125	2.8e-10	3.9172e-05	17.2761	TRUE
	rs275184	G	T	-0.0173487	0.162051	0.00275263	2.9e-10	4.08699e-05	18.0249	TRUE
	rs9376511	G	A	-0.0154993	0.203288	0.00246511	3.2e-10	3.89079e-05	17.1596	TRUE
	rs61993685	C	T	-0.0234087	0.076413	0.00373997	3.9e-10	3.86723e-05	17.0557	TRUE
	rs62397245	G	C	0.0149941	0.22236	0.00239634	3.9e-10	3.88755e-05	17.1453	TRUE
	rs62427982	T	C	-0.0133153	0.32217	0.00213196	4.2e-10	3.87175e-05	17.0756	TRUE
	rs6798755	T	C	-0.0251021	0.065529	0.00401861	4.2e-10	3.85851e-05	17.0172	TRUE
	rs2229092	C	A	0.0256807	0.062054	0.00411268	4.3e-10	3.8385e-05	16.929	TRUE
	rs193735	A	G	0.0329807	0.036665	0.00529922	4.9e-10	3.84192e-05	16.9441	TRUE
	rs11878235	A	G	-0.012703	0.593373	0.00204257	5e-10	3.89347e-05	17.1714	TRUE
	rs12475332	G	T	-0.0140007	0.260988	0.00225386	5.2e-10	3.78069e-05	16.674	TRUE
	rs62128802	T	C	-0.0158746	0.183216	0.00257782	7.4e-10	3.77117e-05	16.632	TRUE
	rs7786339	T	C	0.016328	0.168936	0.00265352	7.6e-10	3.74302e-05	16.5079	TRUE
	rs149142833	T	C	0.0169358	0.156359	0.00276509	9.1e-10	3.78348e-05	16.6863	TRUE
	rs8102873	T	C	0.0123302	0.584919	0.00201474	9.4e-10	3.69121e-05	16.2794	TRUE
	rs45445495	A	C	0.0289415	0.049449	0.00474749	1.1e-09	3.93709e-05	17.3638	TRUE
	rs1420384	T	G	-0.01279	0.66699	0.00210534	1.2e-09	3.63344e-05	16.0246	TRUE
	rs79357714	G	A	-0.0289463	0.045724	0.00476453	1.2e-09	3.65598e-05	16.124	TRUE
	rs12504746	T	C	-0.0152674	0.192857	0.00252148	1.4e-09	3.62841e-05	16.0024	TRUE
	rs4662414	G	A	-0.0120574	0.446608	0.0019918	1.4e-09	3.59308e-05	15.8465	TRUE
	rs2240533	C	T	-0.0129897	0.309898	0.00215234	1.6e-09	3.60853e-05	15.9147	TRUE
	rs12902047	C	A	-0.0129253	0.313907	0.00214533	1.7e-09	3.59803e-05	15.8684	TRUE
	rs56902258	A	T	-0.0151434	0.196198	0.0025129	1.7e-09	3.61652e-05	15.9499	TRUE
	rs12530679	G	A	-0.0121299	0.48466	0.00201682	1.8e-09	3.6749e-05	16.2074	TRUE
	rs72691637	A	G	-0.0154258	0.187053	0.00256576	1.8e-09	3.61845e-05	15.9584	TRUE
	rs1347188	G	A	0.0139021	0.245797	0.00231385	1.9e-09	3.58283e-05	15.8013	TRUE
	rs6562773	G	A	-0.0120538	0.547533	0.00201057	2e-09	3.59952e-05	15.875	TRUE
	rs73025562	A	G	0.0138633	0.245879	0.00231292	2e-09	3.56366e-05	15.7168	TRUE
	rs1835346	G	A	-0.0391877	0.023874	0.00654659	2.2e-09	3.57874e-05	15.7833	TRUE
	rs62274099	T	C	0.0120882	0.424205	0.00202424	2.3e-09	3.56917e-05	15.7411	TRUE
	rs11664106	T	A	-0.0125831	0.374102	0.00210816	2.4e-09	3.7074e-05	16.3507	TRUE
	rs150419156	A	G	-0.0505491	0.015259	0.00847063	2.4e-09	3.8395e-05	16.9334	TRUE
	rs6506033	T	C	-0.0228948	0.072523	0.00383903	2.5e-09	3.52576e-05	15.5496	TRUE
	rs78588343	A	G	-0.0155231	0.176216	0.0026035	2.5e-09	3.49797e-05	15.4271	TRUE
	rs13265978	C	T	0.0213535	0.082718	0.00358645	2.6e-09	3.45972e-05	15.2584	TRUE
	rs138191773	A	G	-0.0471717	0.017021	0.00791884	2.6e-09	3.72299e-05	16.4195	TRUE
	rs6700266	A	G	-0.0124503	0.342465	0.0020932	2.7e-09	3.49056e-05	15.3944	TRUE
	rs9831084	C	T	-0.0118516	0.461922	0.00199656	2.9e-09	3.49114e-05	15.397	TRUE
	rs11904650	G	A	0.0410641	0.020999	0.00692419	3e-09	3.46662e-05	15.2888	TRUE
	rs5755799	G	C	0.0118859	0.453747	0.00200343	3e-09	3.50164e-05	15.4433	FALSE
	rs7400002	G	A	0.0139701	0.230609	0.00236663	3.6e-09	3.46276e-05	15.2718	TRUE
	rs9584870	C	T	-0.0123562	0.366179	0.00210377	4.3e-09	3.54348e-05	15.6278	TRUE
	rs7714361	C	A	0.0138858	0.233667	0.00236622	4.4e-09	3.45268e-05	15.2273	TRUE
	rs10811662	A	G	-0.0154098	0.173212	0.0026291	4.6e-09	3.40068e-05	14.998	TRUE
	rs72603744	C	A	-0.0125232	0.315623	0.00213684	4.6e-09	3.38762e-05	14.9404	TRUE
	rs320369	G	A	-0.0125327	0.683292	0.00214567	5.2e-09	3.39903e-05	14.9907	TRUE
	rs7308584	A	G	0.0149992	0.184436	0.00256911	5.3e-09	3.38407e-05	14.9247	TRUE
	rs2407278	G	A	-0.0339449	0.030154	0.00581961	5.4e-09	3.36974e-05	14.8615	TRUE
	rs71538127	G	C	0.0176494	0.122052	0.00303718	6.2e-09	3.3379e-05	14.7211	TRUE
	rs1340819	C	A	-0.0121655	0.345011	0.00209472	6.3e-09	3.34447e-05	14.7501	TRUE
	rs11187019	G	A	-0.0116437	0.550621	0.00200546	6.4e-09	3.35465e-05	14.795	TRUE
	rs7244	A	G	0.0151978	0.174166	0.00261808	6.4e-09	3.32214e-05	14.6516	TRUE
	rs75268115	G	A	-0.0207435	0.084699	0.0035798	6.8e-09	3.33585e-05	14.712	TRUE
	rs4382584	A	G	0.0129432	0.274334	0.00223541	7e-09	3.33503e-05	14.7084	TRUE
	rs112381903	T	A	0.0231649	0.06731	0.00400864	7.5e-09	3.36882e-05	14.8575	TRUE
	rs4128205	C	A	0.0115011	0.509173	0.00199472	8.1e-09	3.30577e-05	14.5794	TRUE
	rs325485	G	A	-0.0117435	0.602889	0.00204042	8.6e-09	3.30175e-05	14.5617	TRUE
	rs1133400	G	A	0.0137462	0.219923	0.00239759	9.8e-09	3.2417e-05	14.2968	TRUE
	rs7847285	C	T	-0.0116104	0.589213	0.00202626	1e-08	3.26275e-05	14.3896	TRUE
	rs2983896	A	G	0.0137912	0.21474	0.00242177	1.2e-08	3.20723e-05	14.1448	TRUE
	rs2811964	G	A	0.0196101	0.906954	0.00344879	1.3e-08	3.24521e-05	14.3123	TRUE
	rs7077812	C	T	0.0142284	0.194911	0.00250611	1.4e-08	3.17682e-05	14.0107	TRUE
	rs2304969	T	G	-0.0161469	0.144932	0.0028501	1.5e-08	3.23105e-05	14.2498	TRUE
	rs4471666	G	T	-0.022461	0.069488	0.00396699	1.5e-08	3.26205e-05	14.3865	TRUE
	rs62135012	A	G	-0.0117482	0.357929	0.00207507	1.5e-08	3.17192e-05	13.9891	TRUE
	rs11185542	C	G	-0.0126395	0.727914	0.00223848	1.6e-08	3.16407e-05	13.9544	TRUE
	rs2137557	C	T	0.0117624	0.645612	0.00208003	1.6e-08	3.1655e-05	13.9607	TRUE
	rs10277582	T	C	-0.0173714	0.118591	0.00308015	1.7e-08	3.15427e-05	13.9112	TRUE
	rs499293	A	G	-0.0117912	0.65807	0.00208902	1.7e-08	3.12842e-05	13.7972	TRUE
	rs7861679	T	C	0.0122025	0.696815	0.00216741	1.8e-08	3.14574e-05	13.8736	TRUE
	rs55646464	T	G	0.0121913	0.300087	0.00217016	1.9e-08	3.1217e-05	13.7676	TRUE
	rs73238173	G	C	-0.0165938	0.129955	0.00295427	1.9e-08	3.11334e-05	13.7307	TRUE
	rs11637681	G	A	0.0125866	0.276291	0.00224251	2e-08	3.16773e-05	13.9706	TRUE
	rs6028716	A	G	-0.0128217	0.258428	0.00228302	2e-08	3.15053e-05	13.8947	TRUE
	rs11980456	A	G	0.0123903	0.291468	0.00221234	2.1e-08	3.1704e-05	13.9823	TRUE
	rs2187114	A	G	-0.0185151	0.101024	0.00330375	2.1e-08	3.11333e-05	13.7306	TRUE
	rs880315	C	T	-0.011772	0.340211	0.00210497	2.2e-08	3.11067e-05	13.7189	TRUE
	rs394872	T	C	0.0111807	0.536237	0.00200285	2.4e-08	3.10879e-05	13.7106	TRUE
	rs10172544	A	C	-0.0112291	0.408707	0.0020155	2.5e-08	3.04723e-05	13.4391	FALSE
	rs2131311	G	A	-0.0124181	0.714636	0.00222753	2.5e-08	3.14481e-05	13.8695	TRUE
	rs75942983	T	A	-0.0201303	0.083627	0.00361206	2.5e-08	3.10541e-05	13.6957	TRUE
	rs28439112	A	T	0.0126014	0.255528	0.00226754	2.7e-08	3.02082e-05	13.3226	TRUE
	rs2070341	T	C	0.0113012	0.60309	0.00203413	2.8e-08	3.0572e-05	13.4831	TRUE
	rs62473520	C	T	-0.0211003	0.077998	0.00380118	2.8e-08	3.20179e-05	14.1208	TRUE
	rs2702544	G	A	0.0116368	0.658163	0.00209865	2.9e-08	3.04663e-05	13.4365	TRUE
	rs6572807	G	A	0.0124759	0.267065	0.00224899	2.9e-08	3.04668e-05	13.4367	TRUE
	rs12948505	T	C	0.0138887	0.194119	0.00251214	3.2e-08	3.0176e-05	13.3085	TRUE
	rs6924805	T	G	-0.0111556	0.587637	0.00201991	3.3e-08	3.01561e-05	13.2996	TRUE
	rs134551	T	C	-0.0116536	0.335438	0.00211111	3.4e-08	3.02739e-05	13.3516	TRUE
	rs3758413	C	T	0.0111232	0.417724	0.00201767	3.5e-08	3.00939e-05	13.2722	TRUE
	rs4962112	C	T	-0.0110418	0.528394	0.0020048	3.6e-08	3.0382e-05	13.3993	TRUE
	rs9889402	A	G	0.0122827	0.728192	0.00222926	3.6e-08	2.98604e-05	13.1693	TRUE
	rs2276853	A	G	0.0111258	0.59607	0.00202312	3.8e-08	2.98034e-05	13.1441	TRUE
	rs61785481	A	G	0.0111206	0.411762	0.0020225	3.8e-08	2.99541e-05	13.2106	TRUE
	rs6432622	G	A	-0.0108868	0.490264	0.00198007	3.8e-08	2.96194e-05	13.0629	TRUE
	rs278981	C	T	0.0125871	0.758155	0.00229058	3.9e-08	2.905e-05	12.8118	TRUE
	rs61780049	G	A	0.0153212	0.14886	0.00279276	4.1e-08	2.97416e-05	13.1169	TRUE
	rs7135509	C	T	-0.0121338	0.293196	0.00221197	4.1e-08	3.05106e-05	13.456	TRUE
	rs6805924	T	G	0.0109684	0.430548	0.00200571	4.5e-08	2.94961e-05	13.0086	TRUE
	rs12891	C	G	-0.010981	0.431914	0.00201483	5e-08	2.95866e-05	13.0485	FALSE
	rs328301	C	T	-0.0111741	0.62389	0.00205304	5.2e-08	2.92987e-05	12.9215	TRUE
	rs2110690	G	A	0.0107804	0.505034	0.00198236	5.4e-08	2.90513e-05	12.8124	TRUE
	rs2613505	T	C	0.0135401	0.802886	0.00249315	5.6e-08	2.90145e-05	12.7962	TRUE
	rs2137537	C	T	0.0108555	0.544542	0.00200311	6e-08	2.92267e-05	12.8897	TRUE
	rs9342041	A	G	-0.0109729	0.603687	0.00202683	6.2e-08	2.88067e-05	12.7045	TRUE
	rs56321085	A	G	0.0193823	0.084369	0.00358798	6.6e-08	2.90211e-05	12.7991	TRUE
	rs2625541	A	G	-0.0117286	0.297886	0.0021749	6.9e-08	2.87707e-05	12.6886	TRUE
	rs7741310	T	C	0.0107927	0.568561	0.00200425	7.2e-08	2.85731e-05	12.6015	TRUE
	rs12566829	G	A	-0.0282124	0.037075	0.00524725	7.6e-08	2.84154e-05	12.5319	TRUE
	rs11171894	A	G	0.011141	0.629515	0.0020746	7.9e-08	2.89484e-05	12.767	TRUE
	rs7694869	G	A	-0.0110236	0.623834	0.00205715	8.4e-08	2.85165e-05	12.5765	TRUE
	rs7919455	C	T	-0.0222874	0.060506	0.00416299	8.6e-08	2.82365e-05	12.4531	TRUE
	rs11687782	A	T	-0.0105665	0.484399	0.00198172	9.7e-08	2.78856e-05	12.2983	FALSE
	rs12122664	C	A	0.0113861	0.316112	0.00213901	1e-07	2.8027e-05	12.3606	TRUE
	rs2622525	A	G	-0.0167667	0.111866	0.0031499	1e-07	2.79301e-05	12.3179	TRUE
	rs6074626	T	C	-0.0123733	0.247057	0.00232258	1e-07	2.84794e-05	12.5602	TRUE
	rs12891477	T	C	0.0110023	0.368138	0.00207456	1.1e-07	2.81579e-05	12.4184	TRUE
	rs4755720	T	C	-0.0108054	0.60772	0.00203714	1.1e-07	2.78344e-05	12.2757	TRUE
	rs607335	A	C	-0.0106866	0.420007	0.00201069	1.1e-07	2.78201e-05	12.2694	TRUE
	rs2880447	G	A	0.0105061	0.517387	0.00198255	1.2e-07	2.75612e-05	12.1552	TRUE
	rs10406080	G	C	-0.0108209	0.615811	0.00204952	1.3e-07	2.77025e-05	12.2175	TRUE
	rs12870915	T	C	0.0126587	0.22357	0.00239951	1.3e-07	2.7816e-05	12.2676	TRUE
	rs1807675	G	T	0.0110815	0.637492	0.0020967	1.3e-07	2.83785e-05	12.5157	TRUE
	rs9323053	T	C	-0.03364	0.024908	0.00637081	1.3e-07	2.7485e-05	12.1216	TRUE
	rs17321656	T	C	-0.0136337	0.178904	0.00259599	1.5e-07	2.7305e-05	12.0422	TRUE
	rs2618567	T	G	0.0110119	0.658401	0.0020985	1.5e-07	2.72729e-05	12.0281	TRUE
	rs10872918	A	C	0.014693	0.148318	0.00280278	1.6e-07	2.72704e-05	12.027	TRUE
	rs1420091	C	T	-0.0103987	0.526606	0.0019844	1.6e-07	2.69567e-05	11.8886	TRUE
	rs4950877	G	A	-0.0106886	0.542589	0.00204012	1.6e-07	2.83543e-05	12.505	TRUE
	rs72798870	A	G	-0.0123661	0.228857	0.00236675	1.7e-07	2.69876e-05	11.9022	TRUE
	rs55750009	G	T	-0.0106267	0.411813	0.00204433	2e-07	2.73535e-05	12.0636	TRUE
	rs9836434	T	C	0.0121217	0.241333	0.00233175	2e-07	2.69026e-05	11.8648	TRUE
	rs11067675	G	A	0.0150215	0.13856	0.00289214	2.1e-07	2.69333e-05	11.8783	TRUE
	rs1229492	C	T	-0.0116981	0.731129	0.00225463	2.1e-07	2.6901e-05	11.864	TRUE
	rs2247424	T	C	-0.0181261	0.089992	0.00349479	2.1e-07	2.69065e-05	11.8665	TRUE
	rs12549825	G	C	-0.0106165	0.626285	0.00205277	2.3e-07	2.638e-05	11.6343	TRUE
	rs61954254	A	G	-0.0131494	0.193424	0.00254217	2.3e-07	2.69754e-05	11.8968	TRUE
	rs10973159	T	G	0.0105808	0.620536	0.0020501	2.5e-07	2.63618e-05	11.6262	TRUE
	rs11089973	G	A	-0.0128089	0.201635	0.00248263	2.5e-07	2.64114e-05	11.6481	TRUE
	rs61779163	C	T	-0.0147394	0.139846	0.00285974	2.5e-07	2.61328e-05	11.5252	TRUE
	rs11229043	T	C	0.0150552	0.134032	0.00292421	2.6e-07	2.63077e-05	11.6024	TRUE
	rs2378824	T	C	0.0103467	0.574592	0.00200773	2.6e-07	2.61679e-05	11.5407	TRUE
	rs9842991	A	G	0.0109015	0.325629	0.00212379	2.9e-07	2.60972e-05	11.5095	TRUE
	rs12657170	C	T	0.010249	0.452319	0.002004	3.1e-07	2.60217e-05	11.4762	TRUE
	rs13066994	T	C	-0.0105306	0.37735	0.00205872	3.1e-07	2.60552e-05	11.491	TRUE
	rs6473279	T	C	-0.0112657	0.279786	0.00220696	3.3e-07	2.55743e-05	11.2789	TRUE
	rs7326764	G	C	0.0103207	0.432165	0.0020207	3.3e-07	2.61391e-05	11.528	FALSE
	rs256374	G	A	-0.0101129	0.471053	0.00198989	3.7e-07	2.5482e-05	11.2382	TRUE
	rs526363	T	C	-0.010203	0.577436	0.00200827	3.8e-07	2.54011e-05	11.2025	TRUE
	rs6501250	C	T	-0.0101009	0.521802	0.00199134	3.9e-07	2.54585e-05	11.2279	TRUE
	rs173620	G	C	-0.0112051	0.718303	0.00220956	4e-07	2.54051e-05	11.2043	TRUE
	rs4802269	G	A	-0.0105678	0.359432	0.0020855	4e-07	2.57129e-05	11.34	TRUE
	rs4258599	C	T	-0.0107539	0.338419	0.00212496	4.2e-07	2.58922e-05	11.4191	TRUE
	rs759404	T	C	0.0199641	0.068441	0.00394712	4.2e-07	2.54113e-05	11.207	TRUE
	rs194809	A	G	0.0127398	0.193236	0.00252288	4.4e-07	2.53023e-05	11.1589	TRUE
	rs6029127	T	C	-0.0114161	0.261956	0.00226279	4.5e-07	2.51968e-05	11.1124	TRUE
	rs139780022	G	A	-0.039267	0.017262	0.00779424	4.7e-07	2.61568e-05	11.5358	TRUE
	rs13132853	G	A	0.0104711	0.360387	0.0020793	4.8e-07	2.52738e-05	11.1464	TRUE
	rs12546548	C	T	-0.0109293	0.312174	0.00217442	5e-07	2.56484e-05	11.3116	TRUE
	rs1659704	C	T	0.0165261	0.898883	0.00328861	5e-07	2.48238e-05	10.9479	TRUE
	rs56345834	A	T	0.0241798	0.046719	0.00481422	5.1e-07	2.60387e-05	11.4837	TRUE
	rs7681309	T	A	-0.0409426	0.015222	0.00815056	5.1e-07	2.51282e-05	11.0822	TRUE
	rs6795831	C	A	-0.0126419	0.195876	0.0025181	5.2e-07	2.51727e-05	11.1018	TRUE
	rs61908917	A	G	-0.0154208	0.118845	0.00307649	5.4e-07	2.49027e-05	10.9827	TRUE
	rs4980892	A	G	-0.0111387	0.725698	0.0022264	5.6e-07	2.46976e-05	10.8922	TRUE
	rs17574650	C	A	-0.0165727	0.099907	0.00331893	5.9e-07	2.46985e-05	10.8926	TRUE
	rs1833936	C	G	0.0107481	0.309529	0.0021515	5.9e-07	2.46894e-05	10.8886	TRUE
	rs503900	T	C	-0.0105042	0.344389	0.00210269	5.9e-07	2.49127e-05	10.9871	TRUE
	rs34338966	G	A	-0.0122793	0.206999	0.00245989	6e-07	2.47508e-05	10.9157	TRUE
	rs7514004	C	T	0.0102663	0.368433	0.00205626	6e-07	2.45248e-05	10.8161	TRUE
	rs17551213	A	G	-0.0145607	0.13827	0.00292284	6.3e-07	2.52618e-05	11.1411	TRUE
	rs72727861	T	C	-0.0167387	0.100735	0.00336859	6.7e-07	2.53812e-05	11.1937	TRUE
	rs9812801	C	T	0.00989945	0.498707	0.00199472	6.9e-07	2.44996e-05	10.8049	TRUE
	rs4780402	T	C	0.0101656	0.409636	0.00204877	7e-07	2.4991e-05	11.0217	TRUE
	rs12913937	A	G	-0.0104029	0.353441	0.0020983	7.1e-07	2.47306e-05	10.9068	TRUE
	rs16866111	C	T	0.0100689	0.394218	0.00203018	7.1e-07	2.42112e-05	10.6778	TRUE
	rs55824262	C	T	-0.0109415	0.292407	0.00221346	7.7e-07	2.47699e-05	10.9242	TRUE
	rs2738787	G	A	0.0179259	0.918175	0.00362845	7.8e-07	2.4142e-05	10.6472	TRUE
	rs6815138	C	A	-0.00997419	0.416572	0.00201928	7.8e-07	2.41787e-05	10.6634	TRUE
	rs213641	A	C	0.00993786	0.594497	0.00201775	8.4e-07	2.38084e-05	10.5001	TRUE
	rs802685	C	T	-0.0113517	0.24452	0.00230548	8.5e-07	2.38045e-05	10.4984	TRUE
	rs1964691	A	G	-0.0324646	0.024629	0.00659562	8.6e-07	2.53184e-05	11.1661	TRUE
	rs35427	G	T	0.0103015	0.382992	0.00209289	8.6e-07	2.50773e-05	11.0597	TRUE
	rs75490731	T	C	0.0134636	0.158331	0.00273638	8.6e-07	2.41563e-05	10.6535	TRUE
	rs9507493	T	G	-0.0176603	0.084044	0.00359565	9e-07	2.40092e-05	10.5886	TRUE
	rs243177	T	C	0.0115826	0.232321	0.00235944	9.2e-07	2.39266e-05	10.5522	TRUE
	rs7942368	T	C	-0.0119449	0.217506	0.00243405	9.2e-07	2.42838e-05	10.7098	TRUE
	rs188181203	T	A	-0.0234229	0.047354	0.00477379	9.3e-07	2.47497e-05	10.9152	TRUE
	rs17713879	A	G	-0.0100859	0.364814	0.00205794	9.5e-07	2.35723e-05	10.396	TRUE
	rs11714054	C	T	-0.0109721	0.270305	0.0022392	9.6e-07	2.37452e-05	10.4722	TRUE
	rs12547792	A	G	0.00996143	0.389599	0.00203962	1e-06	2.35981e-05	10.4073	TRUE
	rs2483727	G	A	0.0129559	0.173411	0.00265345	1e-06	2.40603e-05	10.6112	TRUE
	rs2769901	A	G	0.0110074	0.731875	0.00225389	1e-06	2.37763e-05	10.4859	TRUE
	rs28387039	A	C	0.0124931	0.183488	0.00255712	1e-06	2.33836e-05	10.3127	TRUE
	rs11881404	G	A	0.00998825	0.625265	0.00205131	1.1e-06	2.33758e-05	10.3093	TRUE
	rs73744635	C	T	-0.0221699	0.051393	0.00454227	1.1e-06	2.39617e-05	10.5677	TRUE
	rs1869582	A	G	-0.00989488	0.45711	0.00204219	1.3e-06	2.42971e-05	10.7156	TRUE
	rs2153272	T	C	-0.0133549	0.846253	0.00276679	1.4e-06	2.32054e-05	10.2341	TRUE
	rs324789	T	G	-0.00998505	0.362923	0.00207018	1.4e-06	2.30519e-05	10.1664	TRUE
	rs16934748	C	T	0.0133852	0.150433	0.00278231	1.5e-06	2.28976e-05	10.0984	TRUE
	rs74397112	T	C	0.0137181	0.141424	0.00284838	1.5e-06	2.28502e-05	10.0775	TRUE
	rs809955	A	G	-0.00994827	0.366015	0.00206583	1.5e-06	2.29653e-05	10.1283	TRUE
	rs9828345	C	T	0.0170095	0.086668	0.00353712	1.5e-06	2.29018e-05	10.1003	TRUE
	rs117189313	A	G	-0.0127106	0.175982	0.00264876	1.6e-06	2.34281e-05	10.3324	TRUE
	rs36184164	G	T	0.0148754	0.115083	0.00310456	1.7e-06	2.25347e-05	9.93832	FALSE
	rs168562	C	T	0.0103772	0.705747	0.00217355	1.8e-06	2.2363e-05	9.86262	FALSE
	rs62420613	A	G	-0.0234401	0.046364	0.00490849	1.8e-06	2.42931e-05	10.7138	TRUE
	rs75313963	C	T	-0.0288237	0.028143	0.00603471	1.8e-06	2.27233e-05	10.0215	TRUE
	rs7893984	C	T	-0.00952427	0.467273	0.00199316	1.8e-06	2.25808e-05	9.95866	FALSE
	rs16975768	T	C	-0.0153567	0.106392	0.00322516	1.9e-06	2.24208e-05	9.88812	FALSE
	rs188248575	G	C	-0.0386626	0.015451	0.0081132	1.9e-06	2.27392e-05	10.0286	TRUE
	rs35665085	A	G	0.0205691	0.055945	0.00432809	2e-06	2.23455e-05	9.85488	FALSE
	rs7609422	A	G	-0.00961054	0.591502	0.00202355	2e-06	2.23173e-05	9.84246	FALSE
	rs76903237	T	C	-0.0457117	0.010847	0.0096106	2e-06	2.24196e-05	9.88758	FALSE
	rs12600928	G	A	-0.0124086	0.178686	0.00261747	2.1e-06	2.25967e-05	9.96569	FALSE
	rs2050114	C	T	0.00943018	0.517129	0.00198856	2.1e-06	2.2206e-05	9.79337	FALSE
	rs2660831	C	T	-0.0155026	0.895817	0.00326619	2.1e-06	2.24298e-05	9.89207	FALSE
	rs9877408	G	A	0.00962334	0.400097	0.00203065	2.1e-06	2.22279e-05	9.80302	FALSE
	rs10160898	A	T	-0.0131058	0.153702	0.00276634	2.2e-06	2.23424e-05	9.85353	FALSE
	rs3800130	A	G	-0.00990555	0.342232	0.00210114	2.4e-06	2.20877e-05	9.7412	FALSE
	rs13090329	A	G	-0.0100754	0.339664	0.0021412	2.5e-06	2.27687e-05	10.0416	TRUE
	rs62172372	G	A	-0.0118458	0.197357	0.00251886	2.6e-06	2.22282e-05	9.80315	FALSE
	rs78360407	A	C	0.0223896	0.045408	0.00477095	2.7e-06	2.17292e-05	9.58307	FALSE
	rs1335462	G	T	-0.00941846	0.430879	0.00200901	2.8e-06	2.1753e-05	9.5936	FALSE
	rs9547275	A	G	0.0119556	0.187929	0.00255334	2.8e-06	2.18138e-05	9.62038	FALSE
	rs7970181	T	C	-0.0159149	0.094158	0.00340448	2.9e-06	2.16032e-05	9.52751	FALSE
	rs17597232	A	G	0.00990121	0.328828	0.00212	3e-06	2.16361e-05	9.54203	FALSE
	rs186622208	A	G	0.049041	0.009325	0.010496	3e-06	2.22177e-05	9.79852	FALSE
	rs79876813	T	C	-0.030364	0.024	0.00650123	3e-06	2.15963e-05	9.52447	FALSE
	rs1997577	T	A	0.012882	0.155302	0.00276014	3.1e-06	2.17693e-05	9.60079	FALSE
	rs11258485	C	T	-0.0111624	0.220551	0.00239802	3.2e-06	2.14196e-05	9.44656	FALSE
	rs158122	T	C	-0.0104282	0.725715	0.00224001	3.2e-06	2.16465e-05	9.5466	FALSE
	rs3813829	G	A	0.0101254	0.322207	0.00217426	3.2e-06	2.23901e-05	9.87458	FALSE
	rs113709122	T	C	-0.0152871	0.102801	0.00328523	3.3e-06	2.15544e-05	9.50601	FALSE
	rs143804589	G	A	0.0185312	0.066452	0.00398652	3.3e-06	2.13035e-05	9.39536	FALSE
	rs4650580	G	A	0.0123106	0.170361	0.00265067	3.4e-06	2.14199e-05	9.44669	FALSE
	rs7189149	G	C	0.0138913	0.126294	0.00299737	3.6e-06	2.12929e-05	9.39065	FALSE
	rs2741566	C	T	-0.0108105	0.754918	0.00233644	3.7e-06	2.16223e-05	9.53596	FALSE
	rs322666	G	C	-0.0116243	0.802023	0.0025207	4e-06	2.14553e-05	9.4623	FALSE
	rs178399	A	G	0.0092168	0.442682	0.00200035	4.1e-06	2.09583e-05	9.24308	FALSE
	rs75736723	T	C	-0.0121767	0.170279	0.00264678	4.2e-06	2.09485e-05	9.23876	FALSE
	rs877640	C	T	0.00956116	0.355282	0.00207989	4.3e-06	2.09394e-05	9.23476	FALSE
	rs990999	A	G	0.00939578	0.382166	0.00204801	4.5e-06	2.08444e-05	9.19287	FALSE
	rs4144479	A	G	0.00932421	0.406499	0.00203417	4.6e-06	2.09751e-05	9.25053	FALSE
	rs11769960	G	A	-0.0155902	0.093802	0.0034044	4.7e-06	2.06604e-05	9.11171	FALSE
	rs35110381	A	T	0.0162747	0.085853	0.0035543	4.7e-06	2.07873e-05	9.16767	FALSE
	rs72853990	A	G	-0.0131971	0.148138	0.00288529	4.8e-06	2.19782e-05	9.69292	FALSE
