# Supplementary material for: Lipid metabolism disorders and albuminuria risk: insights from National Health and Nutrition Examination Survey 2001–2018 and Mendelian randomization analyses
Source: Ren Fail. 2024 Nov 3;46(2):2420841. doi: 10.1080/0886022X.2024.2420841 (PMC11536668; doi:10.1080/0886022X.2024.2420841)
Supplement: Table S2.xls [file IRNF_A_2420841_SM2542.xls]

## Sheet: Sheet1
Exposure	Outcome	Method	nsnp	beta	se	pval	or	or_lci95	or_uci95
Cholesterol esters in large HDL	albuminuria	MR Egger	30	-0.0114087	0.0320644	0.724652	0.988656	0.928435	1.05278
	albuminuria	Weighted median	30	-0.0392019	0.0239975	0.102346	0.961557	0.917377	1.00786
	albuminuria	IVW	30	-0.0503211	0.0168052	0.00275007	0.950924	0.920113	0.982767
	albuminuria	Simple mode	30	-0.0401405	0.0421533	0.348841	0.960654	0.884475	1.0434
	albuminuria	Weighted mode	30	-0.0290008	0.0251085	0.257511	0.971416	0.924767	1.02042
Cholesterol esters in large VLDL	albuminuria	MR Egger	34	0.0690633	0.0243713	0.00790022	1.0715	1.02152	1.12393
	albuminuria	Weighted median	34	0.0748808	0.0211989	0.000411958	1.07776	1.03389	1.12348
	albuminuria	IVW	34	0.0652747	0.015654	3.04811e-05	1.06745	1.0352	1.10071
	albuminuria	Simple mode	34	0.0572136	0.0414248	0.176516	1.05888	0.976306	1.14844
	albuminuria	Weighted mode	34	0.0654753	0.0211288	0.00395422	1.06767	1.02435	1.11281
Cholesterol esters in medium HDL	albuminuria	MR Egger	18	0.061208	0.0738799	0.419586	1.06312	0.919802	1.22877
	albuminuria	Weighted median	18	0.00799965	0.0367614	0.827733	1.00803	0.937956	1.08334
	albuminuria	IVW	18	-0.0319345	0.0346117	0.356189	0.96857	0.905042	1.03656
	albuminuria	Simple mode	18	0.0264096	0.0588461	0.659251	1.02676	0.914911	1.15229
	albuminuria	Weighted mode	18	0.0128407	0.0376523	0.737258	1.01292	0.940863	1.0905
Cholesterol esters in medium LDL	albuminuria	MR Egger	33	0.0781045	0.0232504	0.00208444	1.08124	1.03307	1.13165
	albuminuria	Weighted median	33	0.0764473	0.0214355	0.000361943	1.07945	1.03503	1.12576
	albuminuria	IVW	33	0.0599887	0.0149764	6.18749e-05	1.06182	1.03111	1.09346
	albuminuria	Simple mode	33	0.0375263	0.047069	0.431175	1.03824	0.946742	1.13858
	albuminuria	Weighted mode	33	0.0706606	0.0213404	0.00231015	1.07322	1.02925	1.11906
Cholesterol esters in medium VLDL	albuminuria	MR Egger	32	0.0773402	0.0506141	0.136979	1.08041	0.978374	1.19309
	albuminuria	Weighted median	32	0.0302023	0.0291278	0.299788	1.03066	0.97347	1.09122
	albuminuria	IVW	32	0.0490594	0.0229504	0.032547	1.05028	1.00408	1.09861
	albuminuria	Simple mode	32	0.088337	0.0649865	0.183854	1.09236	0.961716	1.24074
	albuminuria	Weighted mode	32	0.0615083	0.0431135	0.163673	1.06344	0.977268	1.15721
Chylomicrons and extremely large VLDL particles	albuminuria	MR Egger	100	0.0938576	0.0407956	0.0235291	1.0984	1.014	1.18984
	albuminuria	Weighted median	100	0.0943034	0.0345318	0.0063158	1.09889	1.02698	1.17584
	albuminuria	IVW	100	0.0788567	0.0269874	0.00347806	1.08205	1.0263	1.14083
	albuminuria	Simple mode	100	-0.154522	0.0995783	0.123909	0.856824	0.704902	1.04149
	albuminuria	Weighted mode	100	0.0918211	0.0331133	0.00663907	1.09617	1.02728	1.16967
Serum total HDL level	albuminuria	MR Egger	107	-0.0814379	0.0573652	0.158675	0.92179	0.823762	1.03148
	albuminuria	Weighted median	107	-0.0834329	0.0341859	0.0146644	0.919953	0.860332	0.983706
	albuminuria	IVW	107	-0.093339	0.0305526	0.00225039	0.910885	0.857939	0.967098
	albuminuria	Simple mode	107	-0.100129	0.075998	0.190507	0.904721	0.779514	1.05004
	albuminuria	Weighted mode	107	-0.100129	0.0417502	0.0182201	0.904721	0.833636	0.981868
Serum total LDL level	albuminuria	MR Egger	51	0.0365855	0.0595354	0.541717	1.03726	0.92302	1.16565
	albuminuria	Weighted median	51	0.066854	0.0414487	0.106759	1.06914	0.985717	1.15962
	albuminuria	IVW	51	0.0572309	0.0345477	0.0976057	1.0589	0.989572	1.13309
	albuminuria	Simple mode	51	0.100822	0.081145	0.219853	1.10608	0.94344	1.29676
	albuminuria	Weighted mode	51	0.0758079	0.0461549	0.106769	1.07876	0.985451	1.18089
Serum Total cholesterol level	albuminuria	MR Egger	84	0.0171734	0.04417	0.698431	1.01732	0.932953	1.10932
	albuminuria	Weighted median	84	0.0638502	0.0343988	0.0634286	1.06593	0.996435	1.14028
	albuminuria	IVW	84	0.0304048	0.0278709	0.27531	1.03087	0.976069	1.08875
	albuminuria	Simple mode	84	-0.052139	0.0680024	0.445422	0.949197	0.830752	1.08453
	albuminuria	Weighted mode	84	0.0384581	0.0350602	0.27585	1.03921	0.970193	1.11313
Triglycerides	albuminuria	MR Egger	388	0.154662	0.0359623	2.15955e-05	1.16726	1.08782	1.25251
	albuminuria	Weighted median	388	0.116405	0.03366	0.000543695	1.12345	1.05172	1.20007
	albuminuria	IVW	388	0.130602	0.0238389	4.28848e-08	1.13951	1.0875	1.19402
	albuminuria	Simple mode	388	0.27247	0.0904937	0.00277535	1.3132	1.09977	1.56806
	albuminuria	Weighted mode	388	0.126416	0.0437295	0.00405839	1.13475	1.04155	1.2363
