# Supplementary material for: Lipid metabolism disorders and albuminuria risk: insights from National Health and Nutrition Examination Survey 2001–2018 and Mendelian randomization analyses
Source: Ren Fail. 2024 Nov 3;46(2):2420841. doi: 10.1080/0886022X.2024.2420841 (PMC11536668; doi:10.1080/0886022X.2024.2420841)
Supplement: Table S3.xls [file IRNF_A_2420841_SM2538.xls]

## Sheet: Sheet1
Exposure	Outcome	nSNPs	Heterogeneity MR–Egger		Heterogeneity IVW		MR–Egger Pleiotropy Test
			Cochran’s Q	p-Value	Cochran’s Q	p-Value	MR–Egger Intercept	p-Value
Cholesterol esters in large HDL	albuminuria	30	32.3331	0.261167	34.6485	0.216315	-0.00468522	0.167803
Cholesterol esters in large VLDL	albuminuria	34	42.8669	0.0949873	42.9232	0.115626	-0.00058284	0.838879
Cholesterol esters in medium HDL	albuminuria	18	28.2187	0.0297692	31.7547	0.0161391	-0.00996829	0.175963
Cholesterol esters in medium LDL	albuminuria	33	34.5966	0.300062	35.7537	0.296429	-0.00284174	0.316456
Cholesterol esters in medium VLDL	albuminuria	32	52.6928	0.00640679	53.3867	0.00747809	-0.003465	0.534416
Chylomicrons and extremely large VLDL particles	albuminuria	100	210.022	3.79264e-10	210.54	4.87226e-10	-0.000996463	0.623955
Serum total HDL level	albuminuria	107	260.325	3.42597e-15	260.475	5.20017e-15	-0.000606166	0.806505
Serum total LDL level	albuminuria	51	97.69	4.4155e-05	98.0545	5.79675e-05	0.00124776	0.670812
Serum Total cholesterol level	albuminuria	84	162.753	2.82822e-07	163.051	3.74454e-07	0.000851431	0.699419
Triglycerides	albuminuria	388	805.823	8.85313e-32	807.49	8.28189e-32	-0.000830422	0.372006
