# Supplementary material for: Lipid metabolism disorders and albuminuria risk: insights from National Health and Nutrition Examination Survey 2001–2018 and Mendelian randomization analyses
Source: Ren Fail. 2024 Nov 3;46(2):2420841. doi: 10.1080/0886022X.2024.2420841 (PMC11536668; doi:10.1080/0886022X.2024.2420841)
Supplement: Table S4.xls [file IRNF_A_2420841_SM2532.xls]

## Sheet: Sheet1
Exposure	Outcome	nSNP	Method	P-value
albuminuria	Cholesterol esters in large HDL	28	IVW	0.430936
albuminuria	Cholesterol esters in large VLDL	28	IVW	0.118279
albuminuria	Cholesterol esters in medium HDL	28	IVW	0.8688
albuminuria	Cholesterol esters in medium LDL	28	IVW	0.0951735
albuminuria	Cholesterol esters in medium VLDL	28	IVW	0.465947
albuminuria	Chylomicrons and extremely large VLDL particles	28	IVW	0.420624
albuminuria	Serum total HDL level	28	IVW	0.817061
albuminuria	Serum total LDL level	28	IVW	0.215691
albuminuria	Serum Total cholesterol level	28	IVW	0.231479
albuminuria	Triglycerides	28	IVW	0.102849
